# Supplementary material for: Single cell sequencing analysis uncovers genetics-influenced CD16+monocytes and memory CD8+T cells involved in severe COVID-19
Source: bioRxiv or medRxiv preprint supplement (doi:10.1101/2022.02.06.21266924), 2022-02-07
Supplement: Supplementary file [file media-1.pdf]

1  
2  
3  
4  
5  
6  
7  
8  
9  
10  
11  
12  
13  
14  
15  
16  
17  
18  
19  
20  
21  
22  
23  
24

## **1. Supplemental Methods**

### **Supplemental Method S1. Prioritization of candidate causal genes for eight identified genomic loci**

To further explore the causal effects of nine index SNPs in eight genomic loci on severe COVID-19, we performed a prioritization analysis by leveraging the Open Target Genetics (OTG, <https://genetics.opentargets.org/>) tool (1). The OTG tool is a web-access integrative resource that aggregates human GWAS summary statistics, including UK Biobank data and NHGRI-EBI GWAS catalog, and functional genomic data, including protein quantitative trait loci data (pQTLs), expression QTL (eQTL) from eQTL Catalogue, eQTLGen and GTEx, and promoter capture hiC (PCHI-C) from 27 different cell types, and DNase I hypersensitive site (DHS)-gene promoter correlation and other datasets from a wide range of cell types and tissues. Based on the Variant2Gene (V2G) algorithm, for the index SNP rs2166172 in 1p22.2, we prioritized *BARHL2* as a candidate causal gene for severe COVID-19. With the highest V2G score, *CCHCR1* was highlighted as candidate causal gene for the index SNP rs143334143 in 6p21.33, *VSTM2A* as candidate causal gene for rs622568 in 7p11.2, *OAS1* as candidate causal gene for rs2269899 in 12q24.13, *DPP9* as candidate causal gene for rs2109069 in 19p13.3, and *IFNAR2* as candidate causal gene for rs13050728 in 21q22.11. The index SNP of rs13050728 ( $P = 1.91 \times 10^{-11}$ ) in 21q22.11 is highly LD with the reported SNP of rs9976829 ( $R^2 = 1$ ) (2) and rs2236757 ( $R^2 = 0.8266$ ) (3). The index SNP of rs2269899 in 12q24.13 ( $P = 3.24 \times 10^{-8}$ ) shows high LD with the reported SNP of rs10735079 ( $R^2 = 0.9282$ ) (3).

### **Supplemental Method S2. Combination of GWAS summary statistics with scRNA-seq data (dataset #1) by using the MAGMA algorithm**

25 As an independent technical approach to validate genetics-related peripheral immune cells in  
26 PBMCs implicated in severe COVID-19 identified from the RolyPoly algorithm, we applied a  
27 generalized linear regression (GLR) model in the MAGMA (v1.06,  
28 <https://ctg.cncr.nl/software/magma>) (4). Conditioning on the 10% most specific genes from the  
29 single cell data for each cell type, we examined gene-level genetic associations of severe COVID-  
30 19-associated immune cell types by adding these variables as covariates for the linear regression  
31 model. The specificity of each gene for each cell type was calculated by using the mean gene  
32 expression of cell type divided the sum of mean gene expression across all cell types. A window  
33 of 50 kb upstream to 50 kb downstream for a given gene coordinates was set to calculate gene-  
34 level association statistics. The 1,000 Genome Project European Phase 3 panel (5) was used as the  
35 reference panel for both methods. We restricted the GLR analysis to SNPs in the autosomes, and  
36 any SNPs with minor allele frequency < 5% were excluded. The major histocompatibility  
37 complex region (Chr6: 25-35 Mbp) was also excluded due to the extensive linkage disequilibrium  
38 (LD) in this region.

39  
40  
41  
42  
43  
44  
45  
46  
47  
48  
49

50

51 **2. Supplemental Figures**

52

53 **Supplemental Figure S1. UMAP projections of cells in PBMCs from normal controls, mild,**  
54 **moderate, and severe COVID-19 patients by using the Seurat R package (dataset #1).** Dark  
55 green represents normal controls, light green represents mild patients, orange represents moderate  
56 patients, and red represents severe patients.

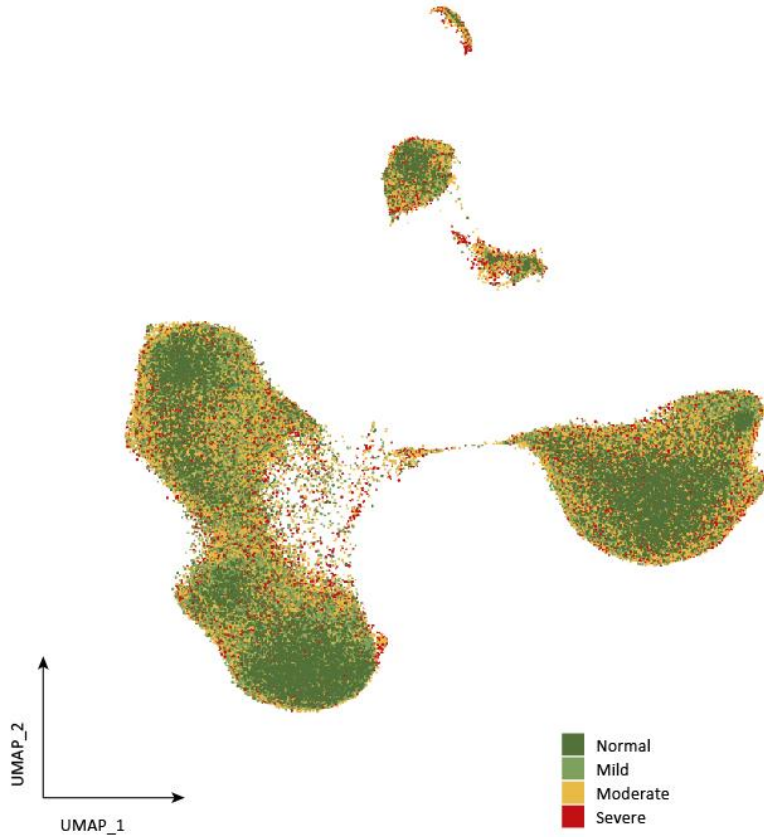

57

58

59

60

61

62

63

64

65

66

67

68 **Supplemental Figure S2. Heatmap showing levels of well-known marker genes specific for**  
69 **each cell type in PBMCs.** Color legend represents the expression level of each marker gene.

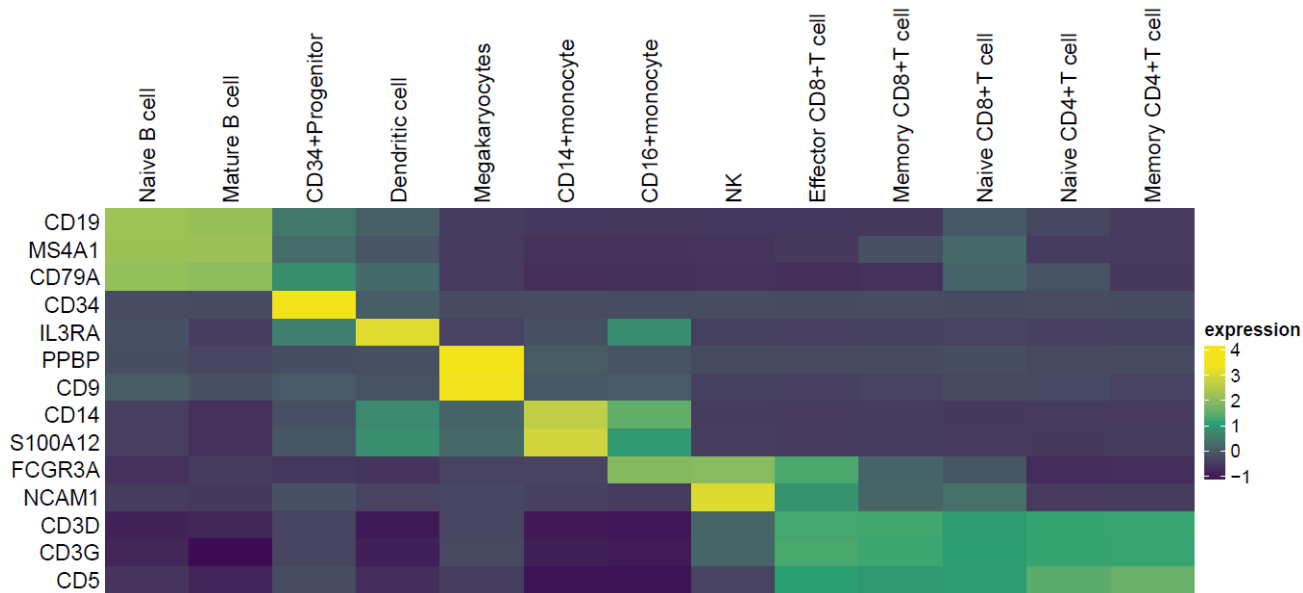

70

71

72

73

74

75

76

77

78

79

80

81

82

83

84

86 **Supplemental Figure S3. Single-cell transcriptomes of PBMCs from normal controls, mild,**  
 87 **moderate, and severe COVID-19 patients.** A) UMAP projections of 514,400 cells from normal  
 88 controls, mild, moderate, and severe patients colored by annotated cell types. There was 13  
 89 clusters with 13 distinct cell types annotated by using well-known markers. B) Normalized  
 90 expression of marker genes on a UMAP plot. For example, the well-known markers of CD14,  
 91 NKG7, PRF1, GNLY, GZMB, LEF1, CD4, CD8A, GZMK, FCGR3A, and NR4A1. C)  
 92 Proportion of cell types among normal controls, mild, moderate, and severe patients. D) Violin  
 93 plots of selected markers (lower row) for 13 cell subpopulations. The left column shows the cell  
 94 types annotated by combinations of markers.

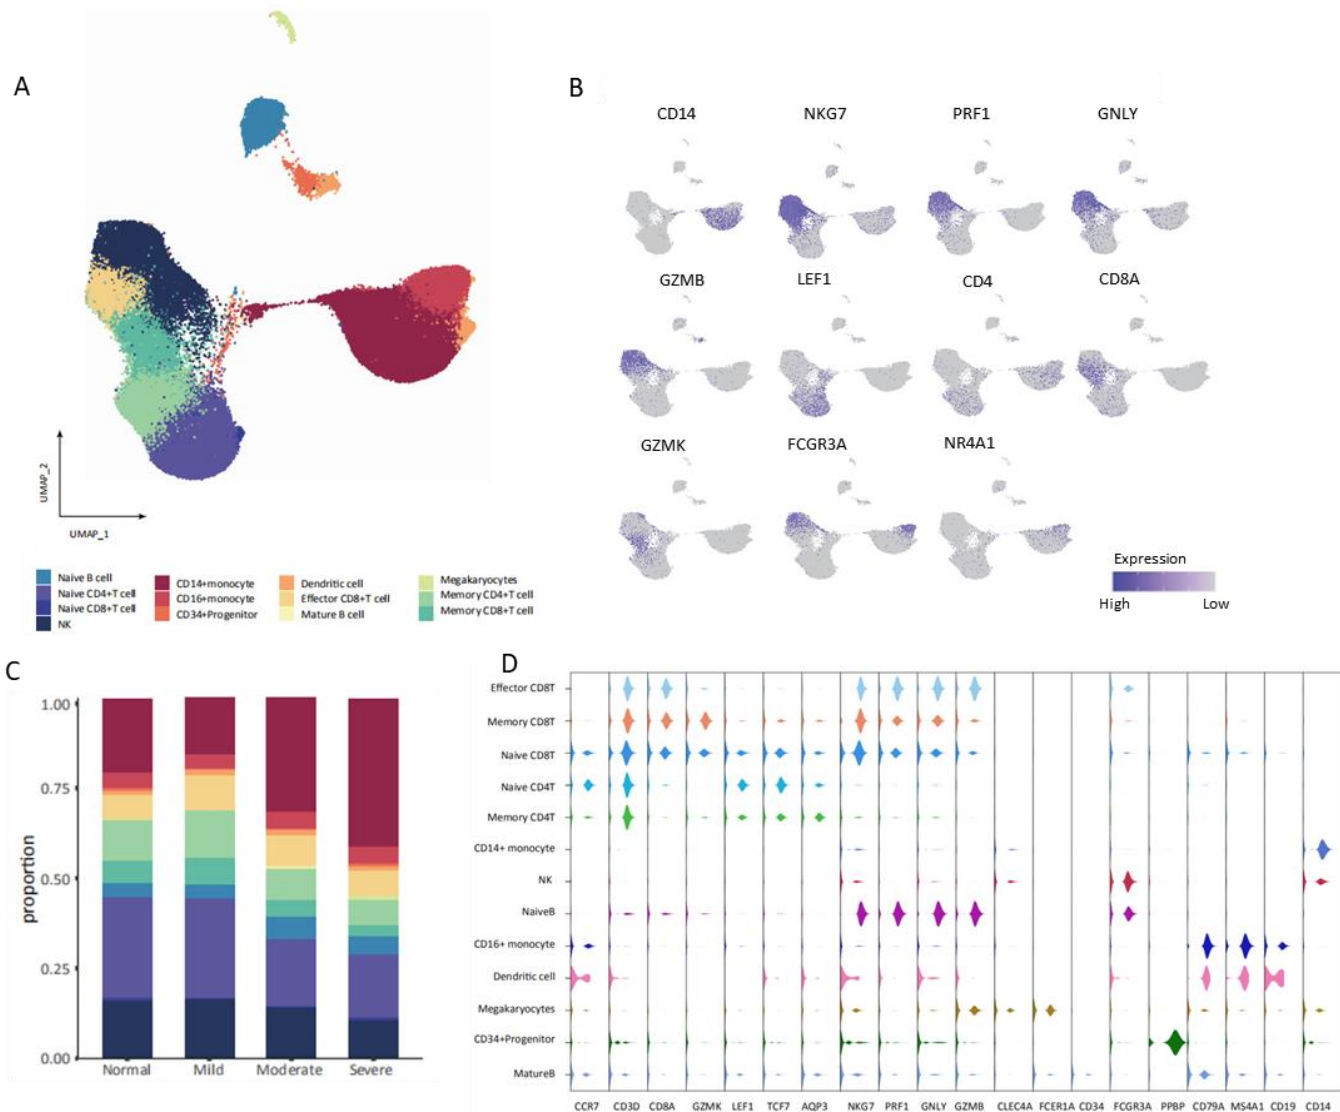

95

96

97

98

99

100

101



119 **Supplemental Figure S5. Boxplots showing percentages of each cell type for PBMCs in**  
120 **donors from healthy control and COVID-19 patients with different severities based on the**  
121 **combined dataset. The statistical analysis for calculating difference among different groups was**  
122 **based on the Wilcoxon sum-rank test.**

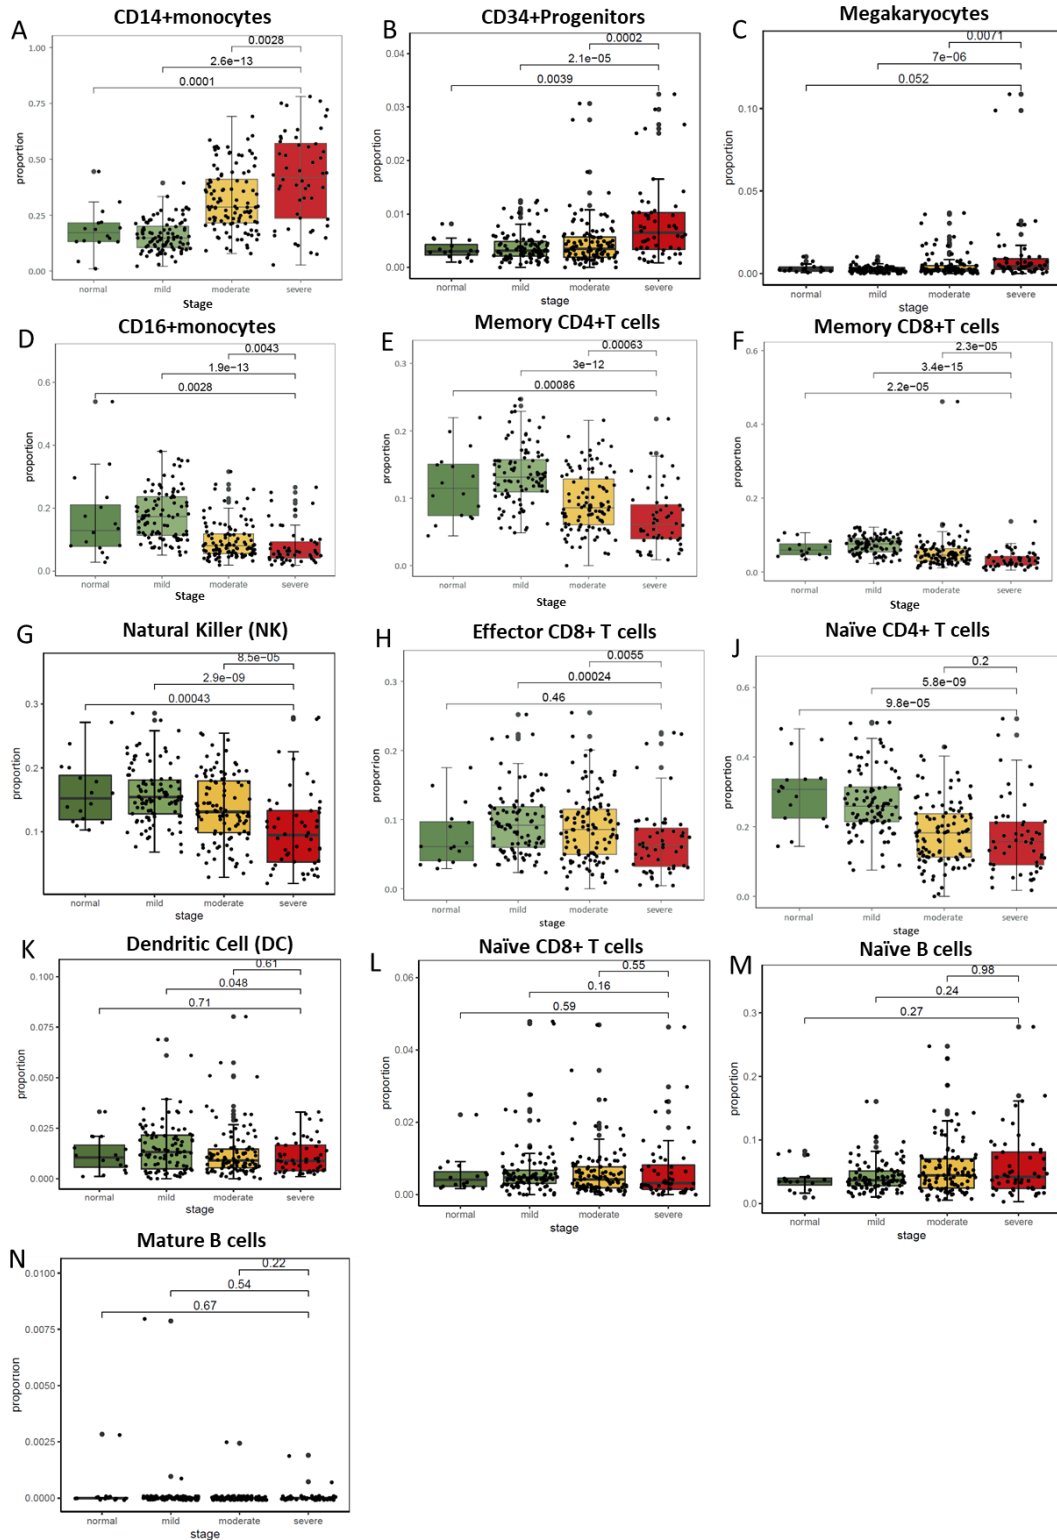

125 **Supplemental Figure S6. Regional association plots for severe COVID-19-associated genetic**  
 126 **loci based on meta-GWAS summary data. A-F) 1p22.2, 6p21.33, 7p11.2, 12q24.13, 19p13.3**  
 127 **and 21q22.11. The purple diamond marks the most strongly associated SNP in each locus with**  
 128 **severe COVID-19. The color illustrates LD information with the given SNP, as shown in the**  
 129 **color legend. The detailed information is shown in Supplemental Table S3.**

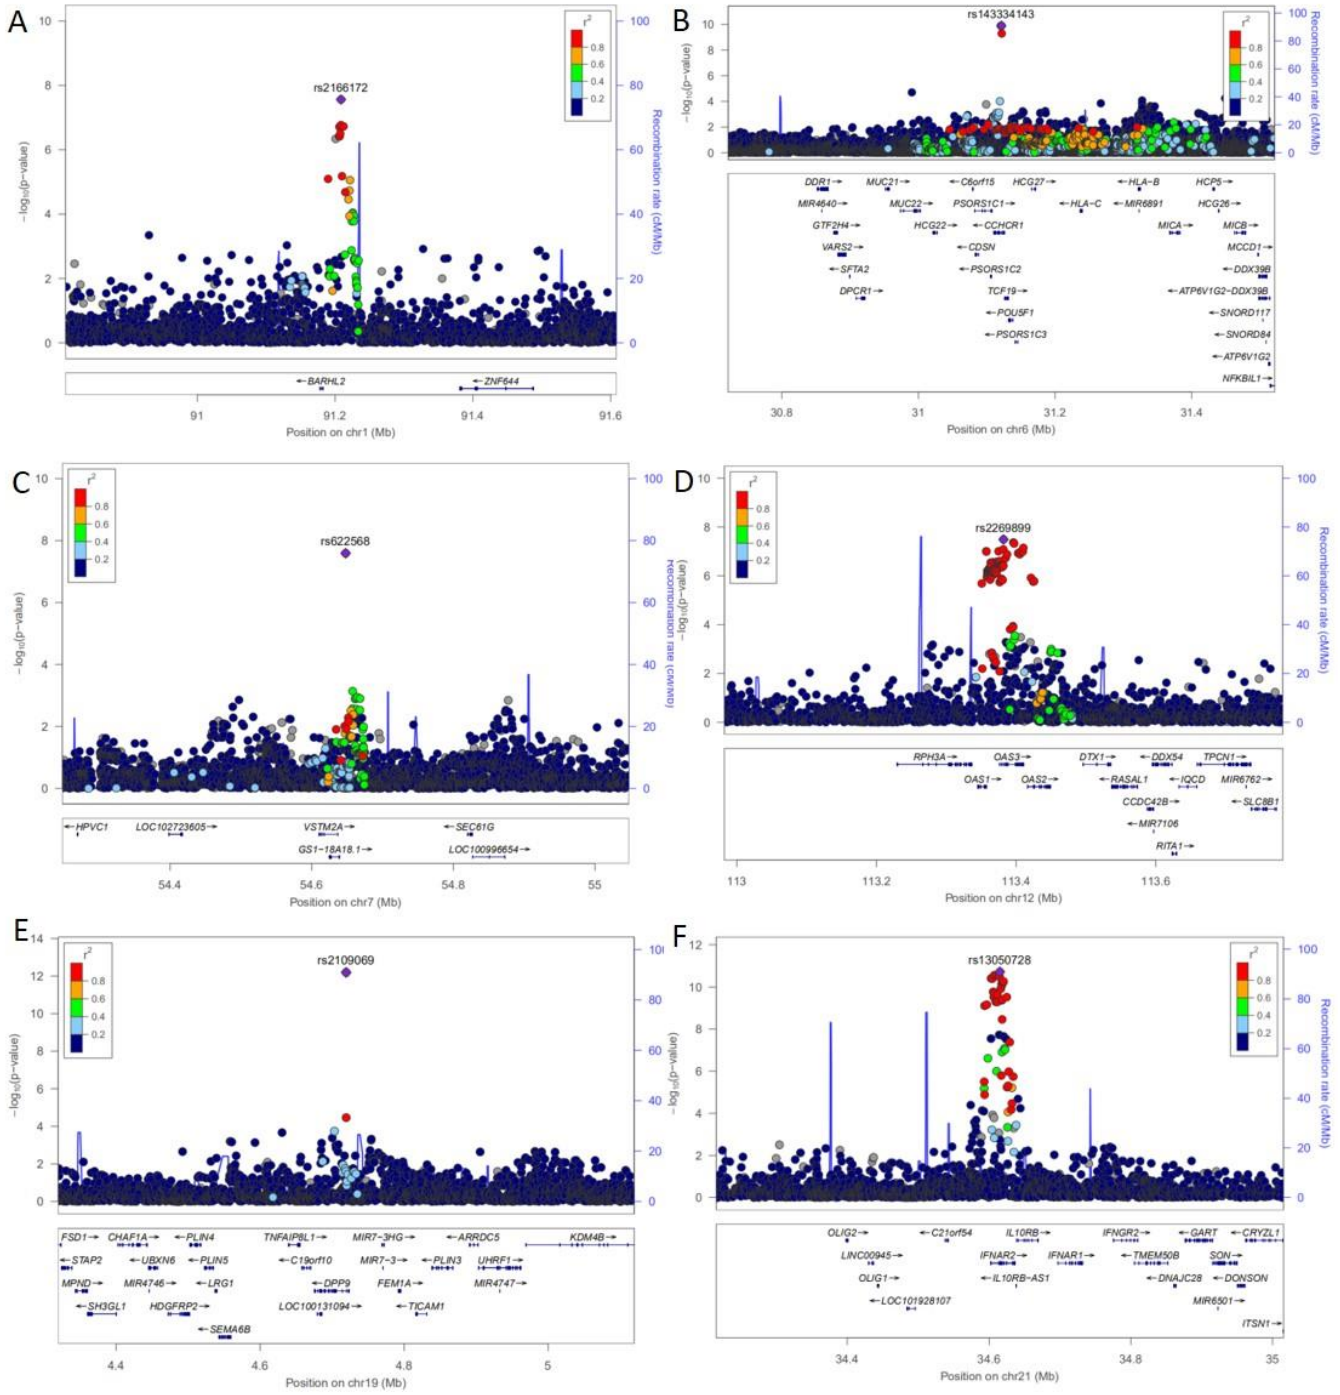



134 **Supplemental Figure S7. Regional association plots for severe COVID-19-associated genetic**  
 135 **loci based on meta-GWAS summary data.** A-B) Two independent genetic association signals in  
 136 the 3p21.31 loci (rs35081325,  $P = 3.32 \times 10^{-58}$ , and rs33998492,  $P = 3.59 \times 10^{-14}$ , respectively). The  
 137 purple diamond marks the most strongly associated SNP in each locus with severe COVID-19.  
 138 The color illustrates LD information with the given SNP, as shown in the color legend. C) The  
 139 results of calculating the LD information between rs35081325 and rs33998492 using the LDpair  
 140 Tool based on the European population (EUR+TSI). D) Regional association plot for the 9q34.2  
 141 locus associated with severe COVID-19.

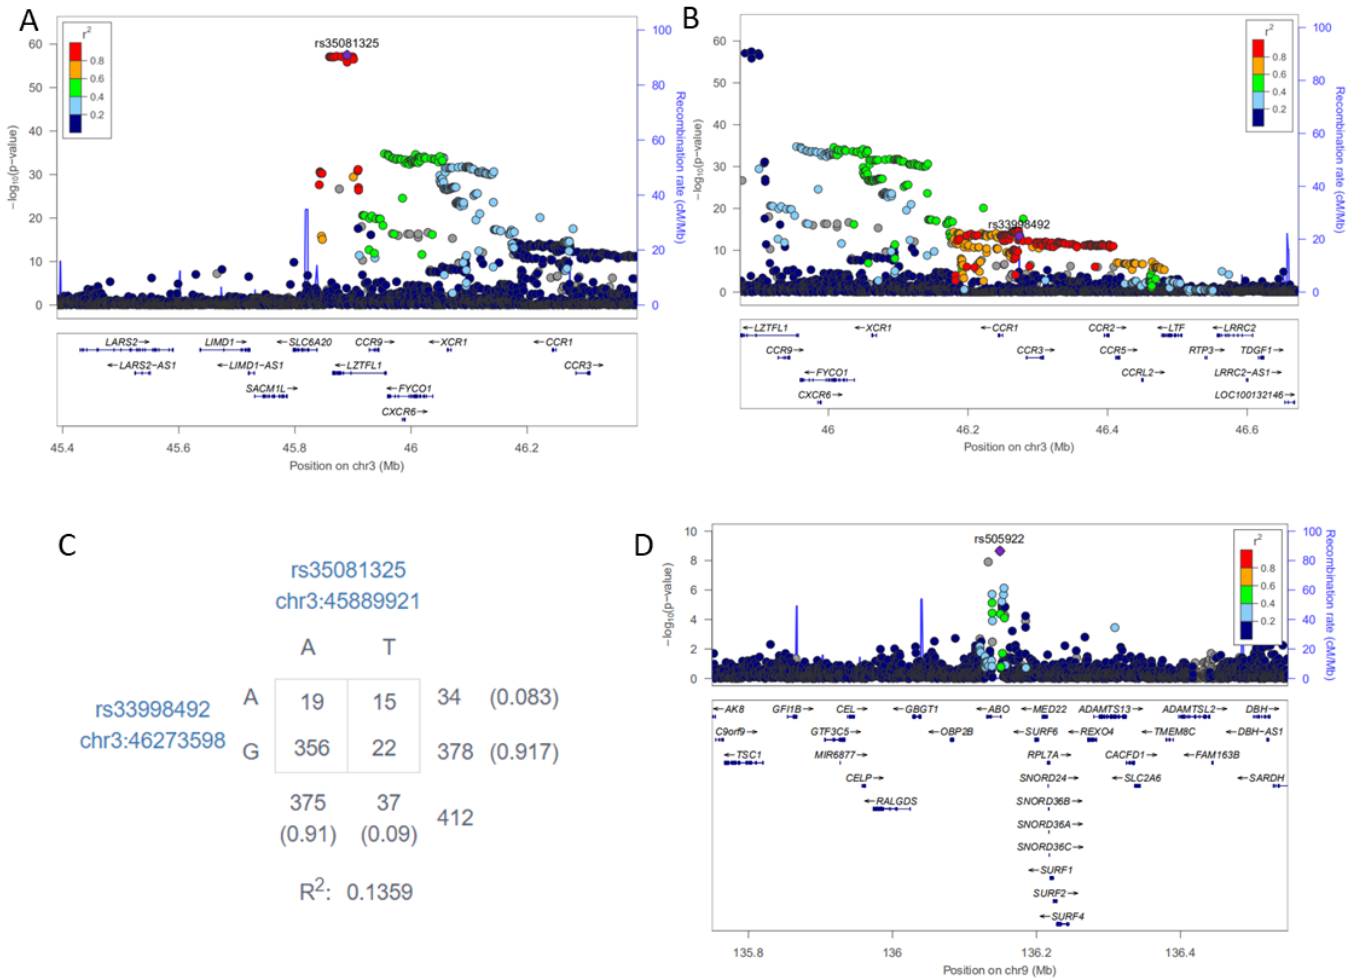

149 **Supplemental Figure S8. Circus plot showing the results of MAGMA-based gene-level**  
 150 **association analysis.** A for lung tissue, and B for blood. The inner ring demonstrates the 22  
 151 autosomal chromosomes (Chr1-22) and X chromosome. In the outer ring, a circular symbol stands  
 152 for a specific gene, and color marks the significant level of the gene. Red color marks genes  
 153 significantly associated with severe COVID-19 with  $FDR < 0.05$ , orange color indicates genes  
 154 suggestively associated with severe COVID-19 with  $6.96 \times 10^{-5} \leq P < 0.001$ , light blue color marks  
 155 suggestive genes with  $0.001 \leq P < 0.05$ , and dark blue indicates genes have non-significant  
 156 associations ( $P > 0.05$ ).  
 157

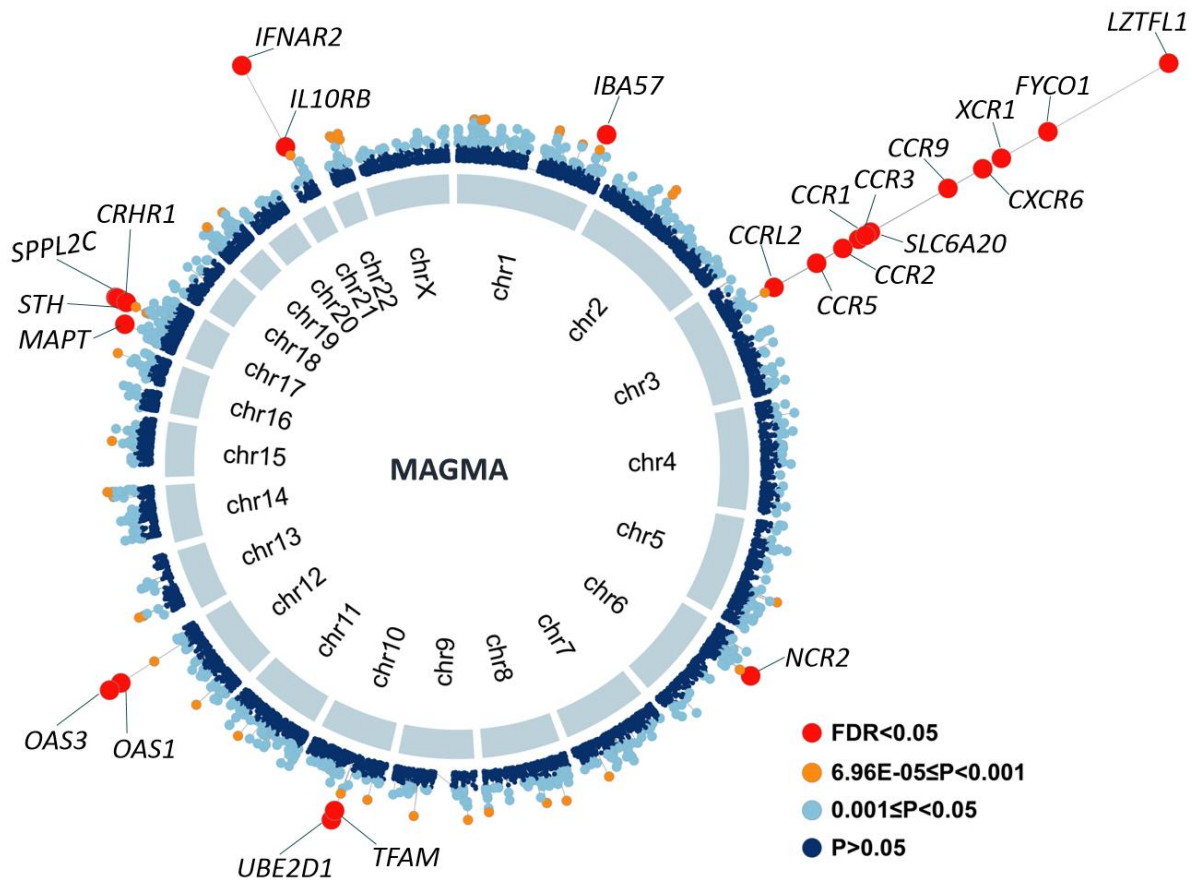

158  
 159  
 160  
 161  
 162  
 163  
 164  
 165

166 **Supplemental Figure S9. The 19 biological pathways enriched from the MAGMA-based**  
 167 **pathway enrichment analysis.** A) Barplot showing the 19 biological pathways based on the  
 168 KEGG pathway. B) Multidimensional scaling plot for clustering the 19 biological pathways based  
 169 on their Jaccard distance (see the Methods). Color represents gene number in each pathway, and  
 170 circular ring size indicates the Z score of enrichment for each pathway. The detailed information  
 171 is shown in Supplemental Table S5.  
 172

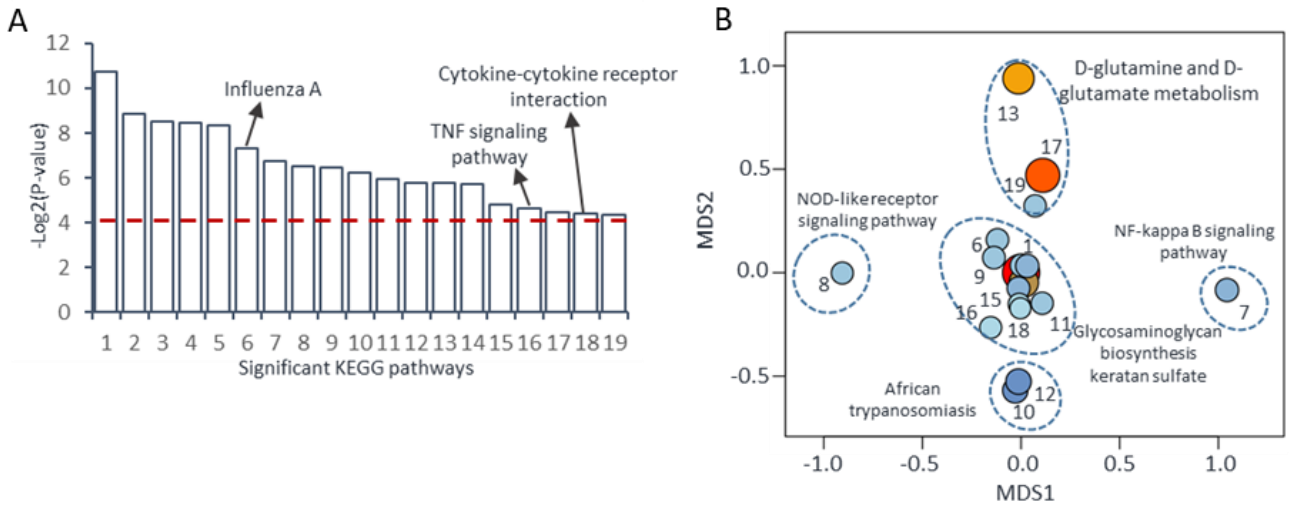

173  
 174  
 175  
 176  
 177  
 178  
 179  
 180  
 181  
 182  
 183  
 184  
 185  
 186

187 **Supplemental Figure S10. High consistence results between MAGMA and S-MultiXcan**  
 188 **analysis.** A) Venn diagram exhibiting the overlapped significant genes between MAGMA and S-  
 189 MultiXcan analysis. B) Correlation of significant risk genes identified from MAGMA and S-  
 190 MultiXcan analysis.  
 191

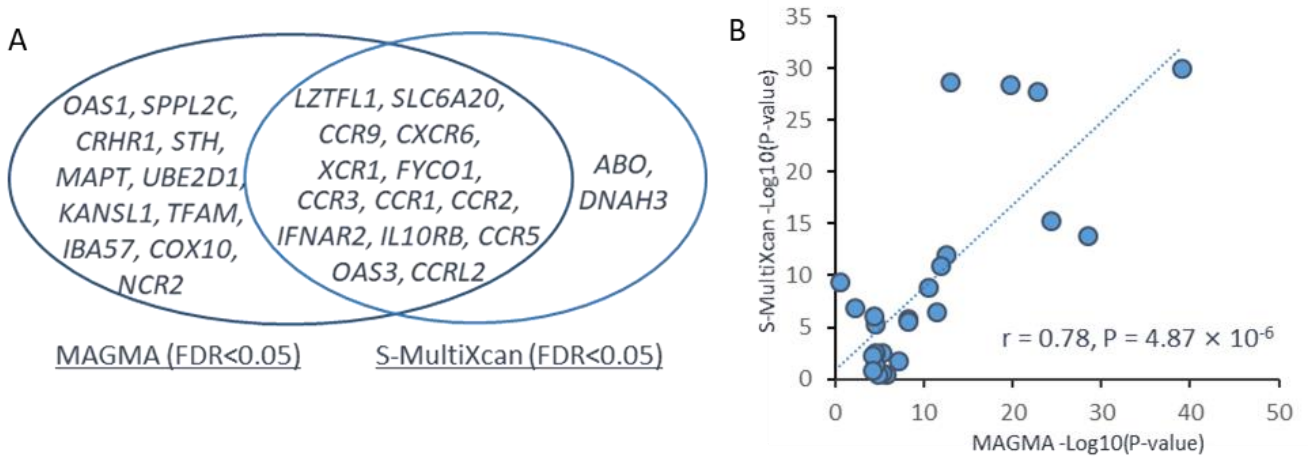

192  
 193  
 194  
 195  
 196  
 197  
 198  
 199  
 200  
 201  
 202  
 203  
 204  
 205  
 206

207 **Supplemental Figure S11. *In silico* permutation analysis of 100,000 times of random**  
208 **selections.** A) The comparison of the top-ranked genes from MAGMA gene-based analysis ( $P < 0.05$ )  
209 with that from S-MultiXcan-based analysis ( $P < 0.05$ ). B) The comparison of the top-ranked  
210 genes from MAGMA gene-based analysis ( $P < 0.05$ ) with that from S-PrediXcan-based analysis  
211 based on lung tissue ( $P < 0.05$ ). C) The comparison of the top-ranked genes from MAGMA gene-  
212 based analysis ( $P < 0.05$ ) with that from S-PrediXcan-based analysis based on blood tissue ( $P <$   
213  $0.05$ ).

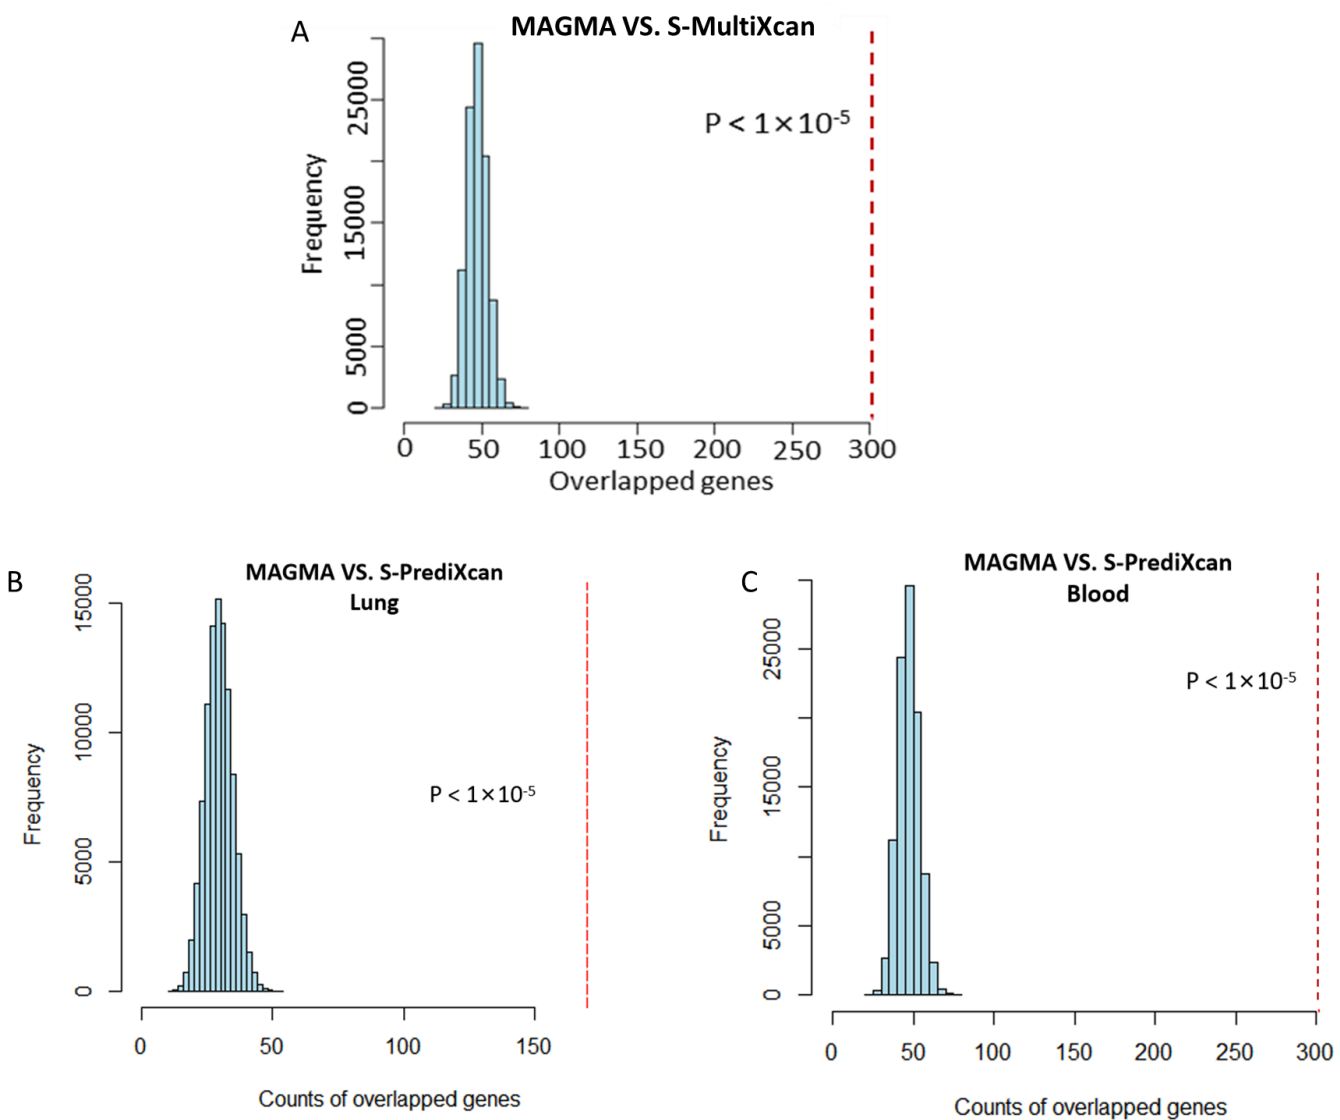

214  
215  
216  
217  
218  
219

**Supplemental Figure S12. Multiple independent approaches identify genetics-relevant risk genes associated with severe COVID-19.** A) Venn diagram showing the overlapped genes among SNP-level association analysis, MAGMA gene-based analysis, S-MultiXcan analysis, and S-PrediXcan analysis based on lung and blood. B) Summary of total 34 genetically risk genes associated with severe COVID-19.

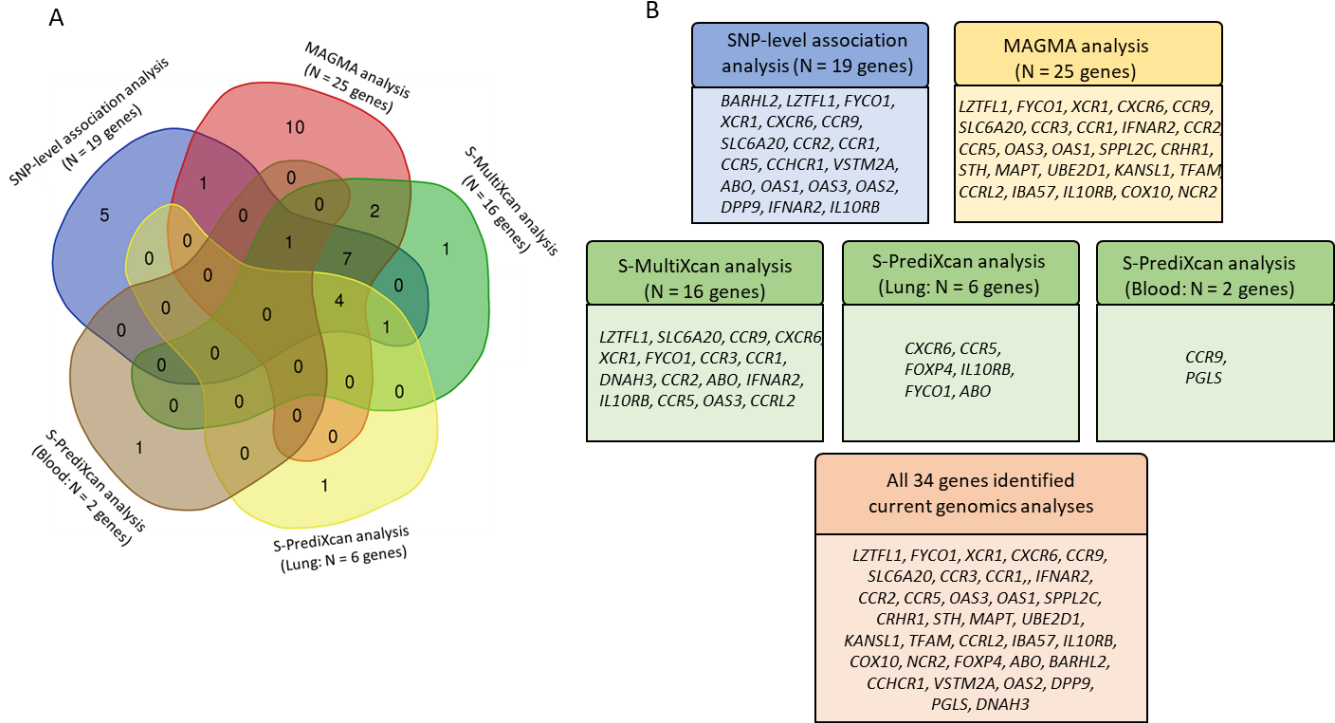

237 **Supplemental Figure S13. The 10 biological pathways significantly enriched by 34 risk**  
 238 **genes based on the KEGG database.** A) Barplot showing these 10 biological pathways  
 239 associated with severe COVID-19. The Arabic numeral in each bar represents the ID of each  
 240 pathway ordered by the significant level (Supplemental Table S10). B) Multidimensional scaling  
 241 plot for clustering these 10 pathways based on the Jaccard distance (see Methods). Color  
 242 represents the significance of each pathway (red color marks the significant pathways with lowest  
 243 P values).  
 244

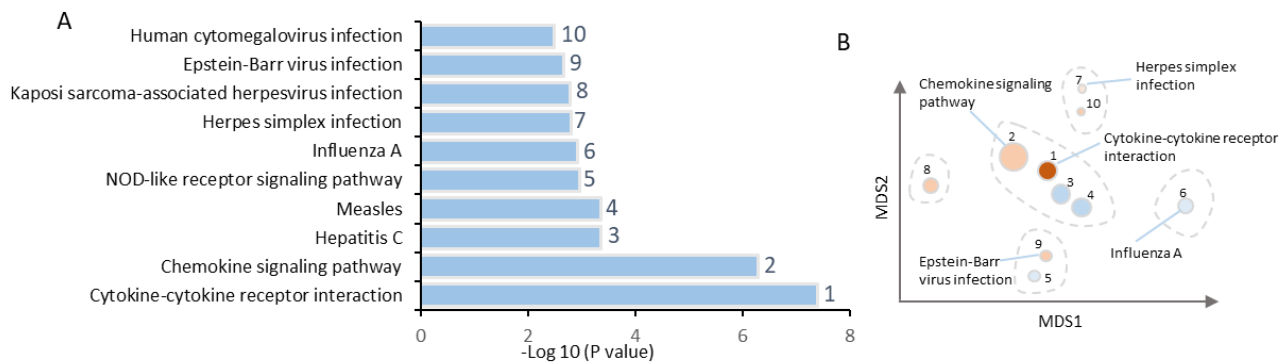

245

246

247

248

249

250

251

252

253

254

255

256

257

258

259

260 **Supplemental Figure S14. Plot of gene-drug interaction analysis for 34 risk genes.** The gene-  
261 drug information was downloaded from the STITCH database (<http://stitch.embl.de/>). The orange  
262 node represents the risk gene, and the light green color stands for the targeted drugs. For more  
263 detail information, see the method for gene-drug interaction analysis.  
264

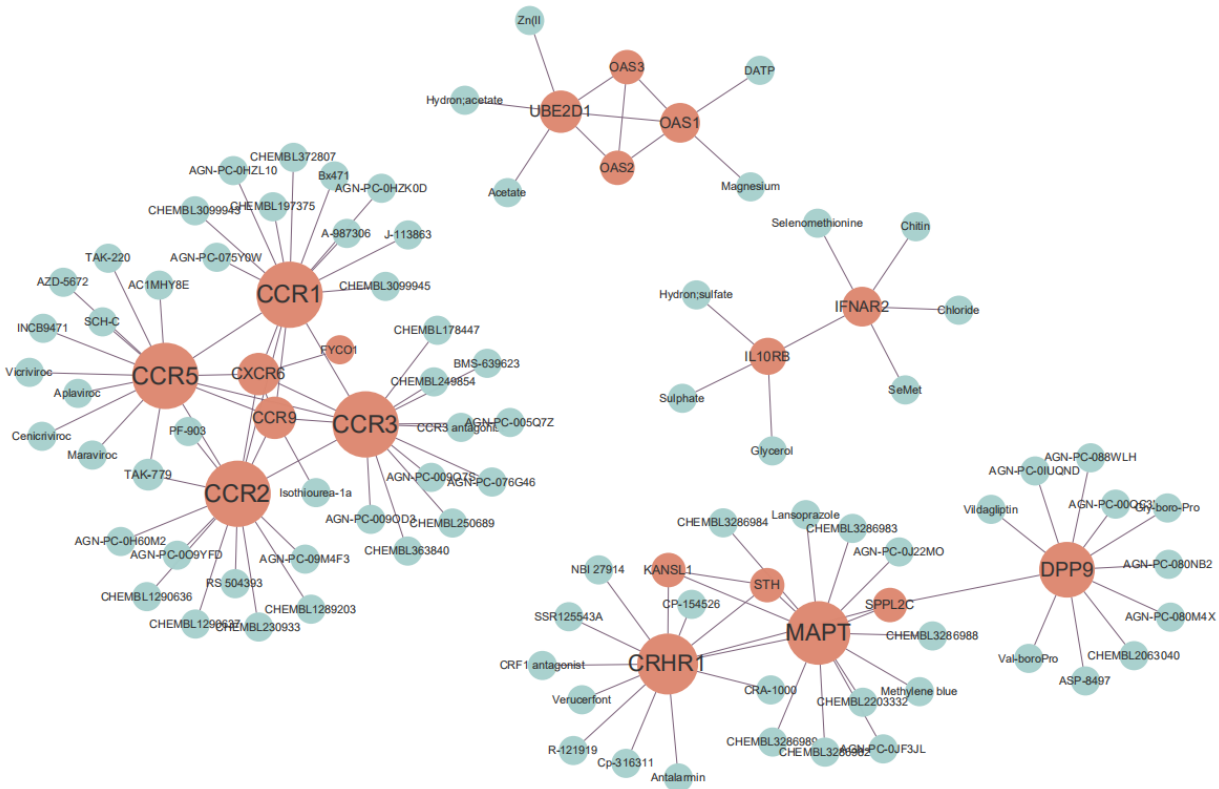



276 **Supplemental Figure S15. Genetics-risk genes influenced three immune cell subsets for**  
 277 **severe COVID-19.** A) Plot showing the specific genes expressed in three identified immune cell  
 278 subsets for severe COVID-19. The most specificity gene for each cell type is *CCR1* for  
 279 CD16+monocytes, *CXCR6* for memory CD8+T cells, and *ABO* for megakaryocytes. B) Dot plot  
 280 showing the expressed percent of three risk genes of *CXCR6*, *CCR1*, and *ABO* in each peripheral  
 281 cell type in PBMCs among severe patients based on the scRNA-seq dataset #1 (E-MTAB-9357).  
 282 Dot size represents fraction of cells within cell type expressing a given gene, and color intensity  
 283 represents binned count-based expression amounts (log(scaled UMI +1)) among expressing cells.

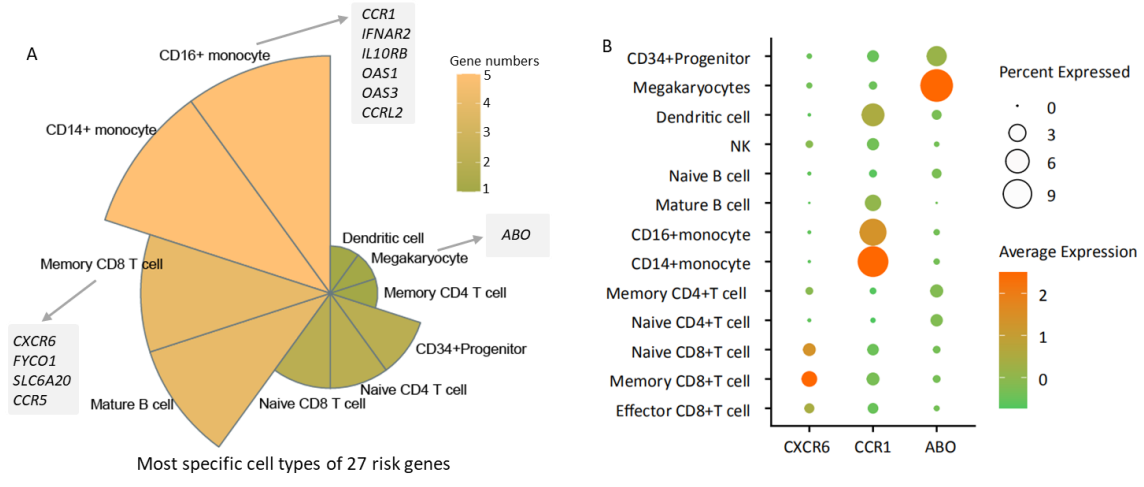

298 **Supplemental Figure S16. Dot plot showing the expressed percent of three risk genes of**  
 299 ***CXCR6*, *CCR1*, and *ABO* in each peripheral cell type in PBMCs among severe patients**  
 300 **based on two scRNA-seq dataset of #2 (GSE149689) and #3 (GSE150861).** Dot size represents  
 301 fraction of cells within cell type expressing a given gene, and color intensity represents binned  
 302 count-based expression amounts (log(scaled UMI +1)) among expressing cells.

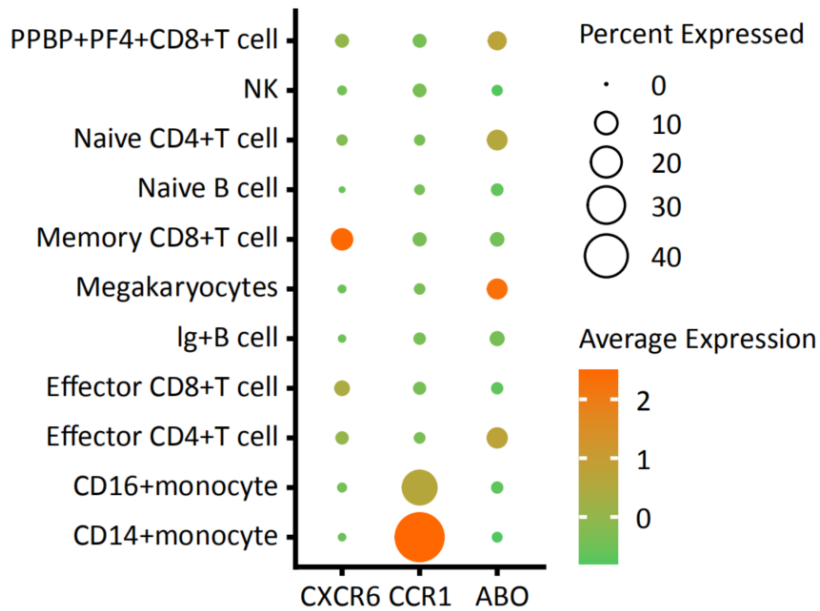

303

304

305

306

307

308

309

310

311

312

313

314

315 **Supplemental Figure S17. *CCR1*<sup>+</sup> CD16+monocytes showing higher risk to cytokine storms**  
 316 **among COVID-19 patients. A) Boxplot showing the difference of pathway activity score of both**  
 317 **cytokine-cytokine receptor interaction and chemokine signaling pathway between *CCR1*<sup>+</sup> and**

318 *CCR1*<sup>-</sup> CD16<sup>+</sup> monocytes. Two-side Wilcoxon sum-rank test was used to calculate the  
 319 significance. B)-C) Barplot showing the proportion of significant druggable proteins (B) and  
 320 significant druggable proteins associated with COVID-19 (C) between *CCR1*<sup>+</sup> and *CCR1*<sup>-</sup>  
 321 CD16<sup>+</sup> monocytes. The hypergeometric test was applied to calculate the significance. D) Venn  
 322 plot exhibiting the overlapped up-DEGs between pairwise comparisons of mild vs. normal,  
 323 moderate vs. normal, and severe vs. normal. E) Functional enrichment analysis based on GO  
 324 biological process for 190 up-DEGs. F) Gene-drug interaction analysis for 190 up-DEGs. G)-L)  
 325 Representative up-DEGs among *CCR1*<sup>+</sup> CD16<sup>+</sup> monocytes showing significantly elevated  
 326 expressions with increased COVID-19 severities. G) *IRF3*, H) *CXCL8*, I) *CD14*, J) *S100A12*, K)  
 327 *IFI6*, and L) *IGSF6*.

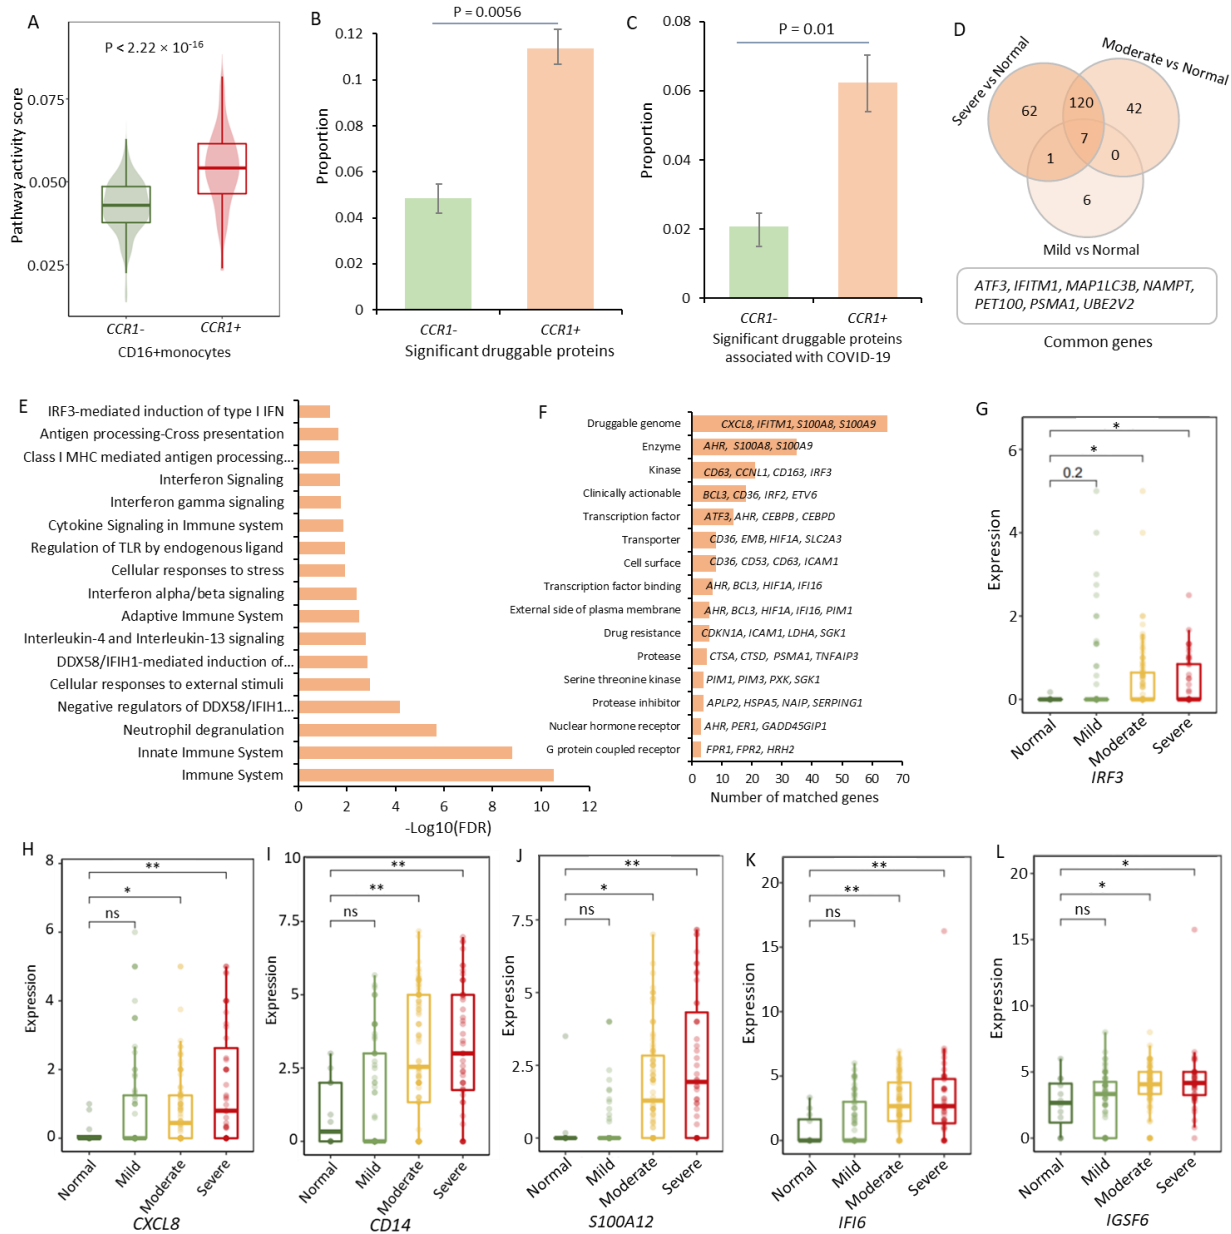

328

329 **Supplemental Figure S18. *ABO*<sup>+</sup> megakaryocytes contribute higher risk to cytokine storms among**  
 330 **severe COVID-19 patients.** A)-B) Boxplot showing the difference of inflammatory cytokine score (A) and  
 331 pathway active score (B) between *ABO*<sup>+</sup> and *ABO*<sup>-</sup> megakaryocytes. There were two pathways of cytokine-cytokine

332 receptor interaction and chemokine signaling pathway used. Two-side Wilcoxon test was applied. C) Volcano plot  
 333 showing differentially expressed genes between *ABO*<sup>+</sup> and *ABO*<sup>-</sup> megakaryocytes. There were 424 highly-expressed  
 334 genes among *ABO*<sup>+</sup> megakaryocytes compared with *ABO*<sup>-</sup> cells. D) Pathway enrichment analysis of 424 highly-  
 335 expressed genes based on the KEGG resource. E) Barplot exhibiting the proportion of *ABO*<sup>+</sup> megakaryocytes among  
 336 normal controls, mild, moderate, and severe COVID-19 patients. F) Barplot showing the differentially up-DEGs from  
 337 the pairwise comparisons of normal controls with different COVID-19 severities. Venn plot on the top of bar  
 338 showing the overlapped up-DEGs between moderate and severe patients. G) Heatmap showing the up-DEGs from the  
 339 pairwise comparisons. F) Gene-drug interaction analysis for 35 up-DEGs. I-N) Representative up-DEGs among  
 340 *ABO*<sup>+</sup> megakaryocytes showing significantly elevated expressions with increased COVID-19 severities.

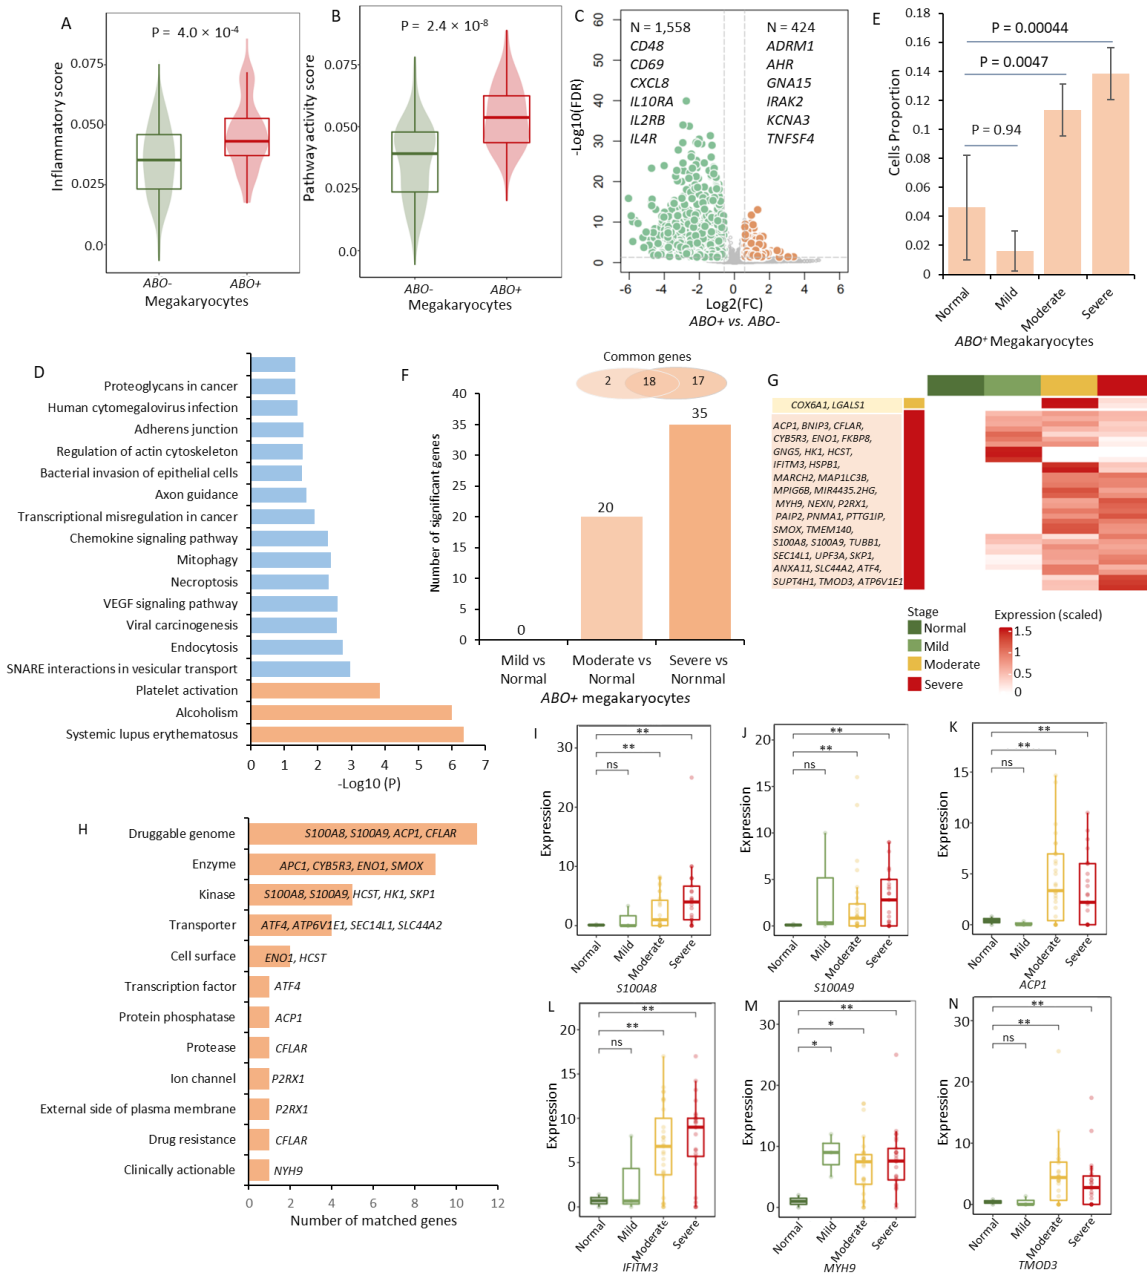

341

342

343 **Supplemental Figure S19. Evidence showing the multi-functionality of *CXCR6*<sup>+</sup> memory CD8<sup>+</sup>T**  
 344 **cells for severe COVID-19. A)-C) Boxplots showing the difference of inflammatory score (A),**  
 345 **proliferation score (B), and migration score (C) between *CXCR6*<sup>+</sup> and *CXCR6*<sup>-</sup> memory CD8<sup>+</sup>T cells.**

346 Two-side Wilcoxon sum-rank test was used. D) Pathway enrichment analysis of 158 highly-expressed  
 347 genes based on the KEGG resource. E)-F) Boxplots showing the cytotoxicity score (E) and exhaustion  
 348 score (F) of among normal, mild, moderate, and severe groups. G)-N) Representative up-DEGs among  
 349 *CXCR6*<sup>+</sup> memory CD8+T cells showing significantly elevated expressions with increased COVID-19  
 350 severities. G) *TCF7*, H) *HELB*, I) *COPS6*, J) *PSMB6*, K) *PUF60*, L) *RAB51F*, M) *NDUFAF3*, and N)  
 351 *HLA-DPB1*.

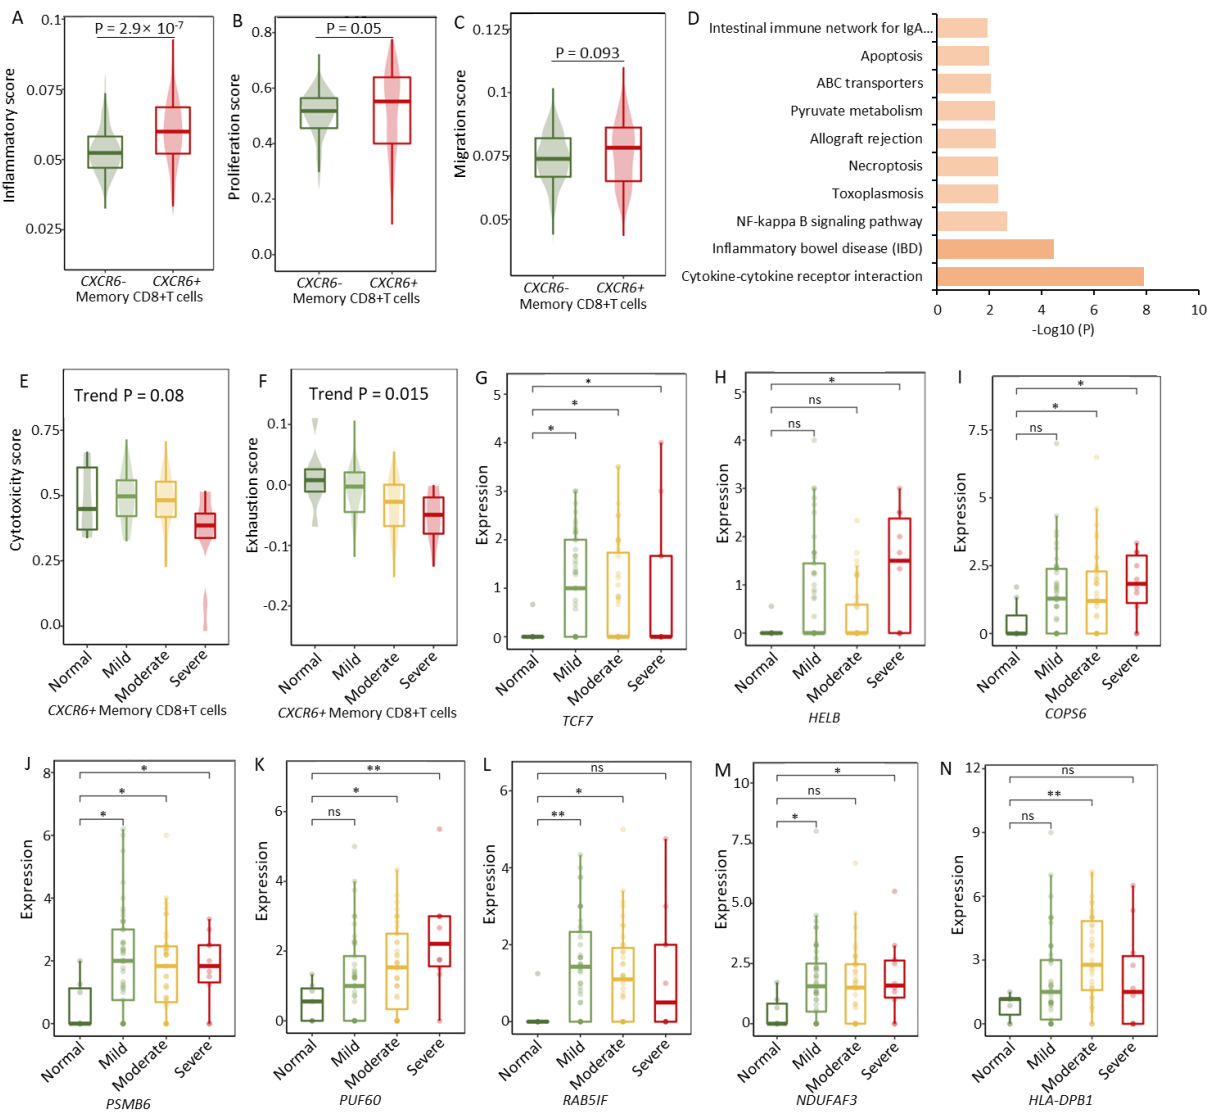

352  
 353  
 354  
 355  
 356  
 357  
 358 **Supplemental Figure S20. Differences in the number of predicated cell-to-cell interactions in**  
 359 **PBMCs, comparing severe COVID-19 patients with normal controls. Color legend represents**

360 the differential number of cellular interactions. Red rectangle marks the elevated interactions of  
 361 both *CCR1*<sup>+</sup> CD16<sup>+</sup> monocytes and *CXCR6*<sup>+</sup> memory CD8<sup>+</sup>T cells with other immune cells in  
 362 PBMCs.

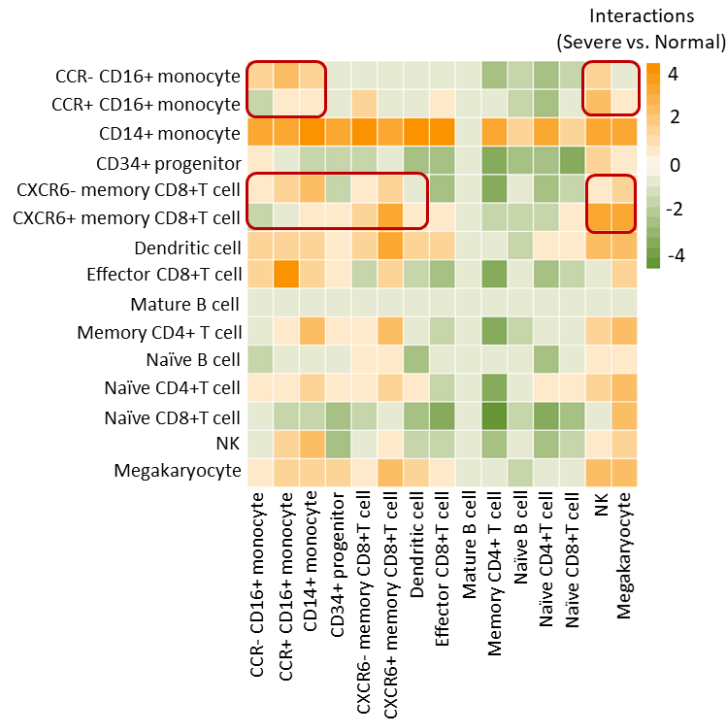

363  
364  
365  
366  
367  
368  
369  
370  
371  
372  
373  
374

375 **Supplemental Figure S21. Prediction of cell-to-cell interactions of cells in BALFs.** A) The  
 376 number of predicated cellular interactions of cells in BALFs. Color legend represents the number  
 377 of predicted cellular interactions. The Arabic numerals in the heatmap represent the specific

378 number of cellular interactions between pairwise cell types in BALFs. B) The increased percent  
 379 of cellular interactions of *CCR1*<sup>+</sup> CD16+ monocytes with epithelial cells compared with *CCR1*<sup>-</sup>  
 380 CD16+ monocytes. C) The increased percent of cellular interactions of *CXCR6*<sup>+</sup> memory CD8+T  
 381 cells with epithelial cells compared with *CXCR6*<sup>-</sup> memory CD8+T cells.  
 382

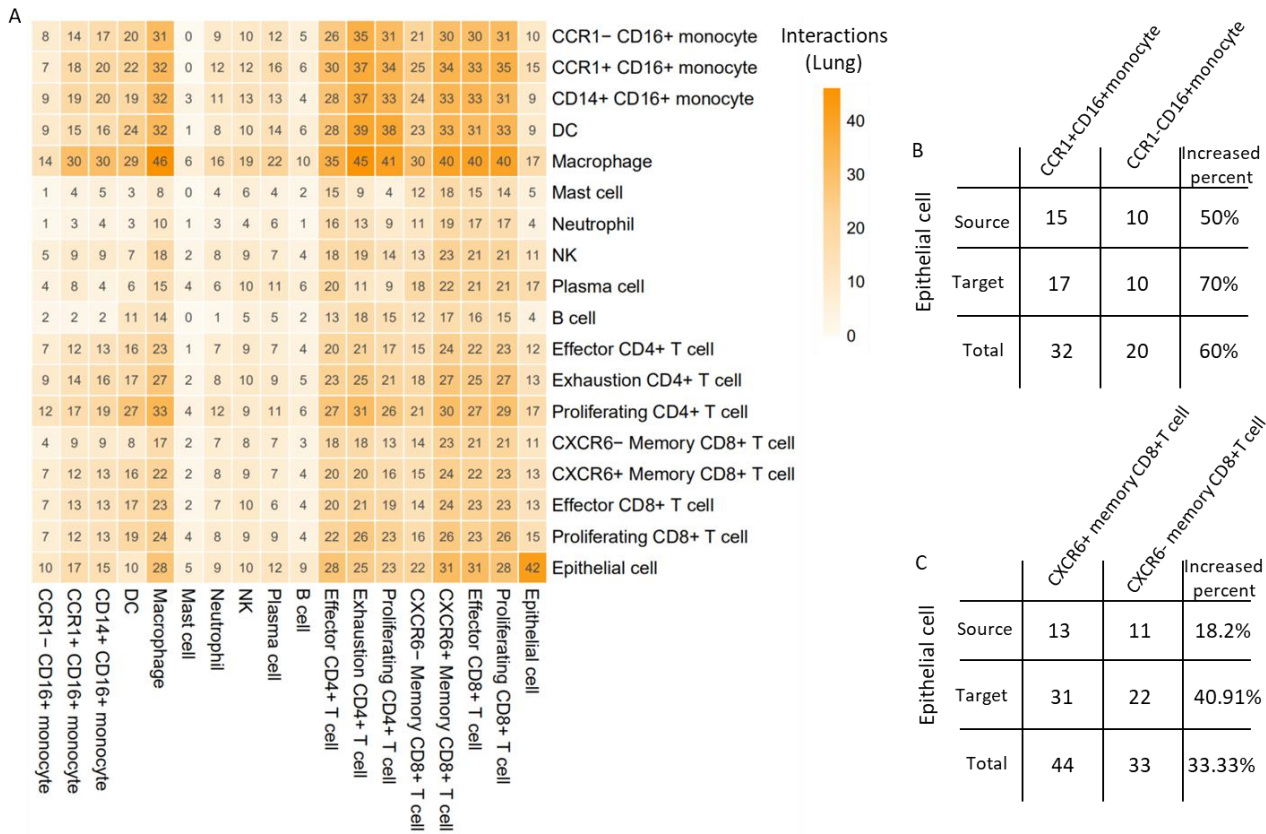

383  
384  
385  
386  
387  
388  
389  
390  
391

392 **3. Supplemental Tables**

393 **Supplemental Table S1. Samples collected from four independent scRNA-seq datasets on**  
 394 **COVID-19**

| Characteristics   | Dataset #1 (E-MTAB-9357) | Dataset #2 (GSE149689) | Dataset #3 (GSE150861) | Dataset #4 (GSE158055) | Total samples |
|-------------------|--------------------------|------------------------|------------------------|------------------------|---------------|
| Normal controls   | 16                       | 4                      | 0                      | 0                      | 20            |
| Mild COVID-19     | 96                       | 5                      | 0                      | 0                      | 101           |
| Moderate COVID-19 | 106                      | 0                      | 0                      | 3                      | 109           |
| Severe COVID-19   | 52                       | 6                      | 3                      | 9                      | 70            |
| Remission         | 0                        | 0                      | 4                      | 0                      | 4             |

395  
 396 **Supplemental Table S2. Selected well-known markers used to define cell types in PBMCs**

| Cell types                | Markers                                                          |
|---------------------------|------------------------------------------------------------------|
| CD14+ monocytes           | <i>CD14, CD4, NR4A1</i>                                          |
| CD16+ monocytes           | <i>FCGR3A, CX3CR1, CD16, CD4, NR4A1</i>                          |
| Naïve CD4+T cells         | <i>LEF1, CD197, TCF7, CD3D, CD3E, CD4</i>                        |
| Naïve CD8+T cells         | <i>LEF1, CD197, TCF7, CD3D, CD3E, CD8A</i>                       |
| Effector CD4+T cells      | <i>PRDM1, PRF1, GZMB, GNLY, CD3D, CD3E, CD4</i>                  |
| Effector CD8+T cells      | <i>PRDM1, PRF1, GZMB, GNLY, CD3D, CD3E, CD8A</i>                 |
| Memory CD4+T cells        | <i>GZMK, CD69, AQP3, CD3D, CD3E, CD4</i>                         |
| Memory CD8+T cells        | <i>GZMK, CD69, AQP3, CD3D, CD3E, CD8A</i>                        |
| Exhaustion CD4+T cells    | <i>LAG3, TIGIT, CD279, PDCD1, TIM3, CD3D, CD3E, CD4</i>          |
| Exhaustion CD8+T cells    | <i>LAG3, TIGIT, CD279, PDCD1, TIM3, CD3D, CD3E, CD8A</i>         |
| Proliferating CD4+T cells | <i>MK167, TYMS, CD3D, CD3E, CD4</i>                              |
| Proliferating CD8+T cells | <i>MK167, TYMS, CD3D, CD3E, CD8A</i>                             |
| Regulatory CD4+T cells    | <i>FOXP3, CD3D, CD3E, CD4</i>                                    |
| Regulatory CD8+T cells    | <i>FOXP3, CD3D, CD3E, CD8A</i>                                   |
| NK                        | <i>FCGR3A, CD16, TRGC1, NKG7, NCAM1, CD38, CD62L, GZMB, CD56</i> |
| B                         | <i>CD79A, MS4A1, CD19</i>                                        |
| Plasma B                  | <i>CD79A, CD38</i>                                               |
| Naïve B                   | <i>IGHD, FCER2</i>                                               |
| mDC                       | <i>CD14, CD1C</i>                                                |
| pDC                       | <i>CLEC4A, CD123</i>                                             |
| Megakaryocyte             | <i>PPBP</i>                                                      |
| Progenitor                | <i>CD34, CD38</i>                                                |
| DC                        | <i>FCERIA, IL3RA, CD1C, CD141</i>                                |

397  
 398 **Supplemental Table S3. Significant SNPs associated with severe COVID-19 identified by**  
 399 **meta-GWAS analysis**



| SNP         | CHR | POS       | Loci     | ATL | OR (95% CI)         | Meta P-value |
|-------------|-----|-----------|----------|-----|---------------------|--------------|
| rs35081325  | 3   | 45489921  | 3p21.31  | T   | 1.81 (1.788-1.853)  | 3.32E-58     |
| rs2109069   | 19  | 4319443   | 19p13.3  | A   | 1.183 (1.175-1.191) | 6.40E-13     |
| rs13050728  | 21  | 34215210  | 21q22.11 | C   | 0.858 (0.851-0.865) | 1.914E-11    |
| rs143334143 | 6   | 30721426  | 6p21.33  | A   | 1.273 (1.241-1.273) | 1.283E-10    |
| rs505922    | 9   | 135749229 | 9q34.2   | T   | 0.88 (0.875-0.886)  | 2.24E-09     |
| rs622568    | 7   | 54247894  | 7p11.2   | C   | 1.167 (1.158-1.175) | 2.57E-08     |
| rs2166172   | 1   | 90808514  | 1p22.2   | C   | 1.132 (1.126-1.137) | 2.74E-08     |
| rs2269899   | 12  | 112981956 | 12q24.13 | T   | 1.132 (1.127-1.138) | 3.24E-08     |

**Note:** SNP =single nucleotide polymorphism, CHR = chromosome, POS = position, ATL = altered allele, OR = odds ratio, 95% CI = 95% confidence interval, Meta P-value is generated from the Metal tool by meta-analyzing 969,689 samples from 21 independent contributing studies.

**Supplemental Table S4. Significant genes associated with severe COVID-19 identified by MAGMA gene-based association analysis**

| Gene name      | CHR | Start POS | Stop POS  | Number of SNPs | Z score | P value  | FDR      |
|----------------|-----|-----------|-----------|----------------|---------|----------|----------|
| <i>LZTFL1</i>  | 3   | 45844808  | 45977216  | 314            | 13.14   | 1.01E-39 | 1.93E-35 |
| <i>FYCO1</i>   | 3   | 45939391  | 46057316  | 331            | 11.15   | 3.67E-29 | 3.51E-25 |
| <i>XCRI</i>    | 3   | 46042291  | 46088979  | 165            | 10.28   | 4.36E-25 | 2.78E-21 |
| <i>CXCR6</i>   | 3   | 45964973  | 46009845  | 120            | 9.91    | 1.86E-23 | 8.90E-20 |
| <i>CCR9</i>    | 3   | 45907996  | 45964667  | 152            | 9.19    | 2.01E-20 | 7.69E-17 |
| <i>SLC6A20</i> | 3   | 45776941  | 45858039  | 208            | 7.33    | 1.19E-13 | 3.80E-10 |
| <i>CCR3</i>    | 3   | 46263872  | 46328197  | 214            | 7.19    | 3.35E-13 | 9.16E-10 |
| <i>CCRI</i>    | 3   | 46223200  | 46269832  | 177            | 7.00    | 1.30E-12 | 3.11E-09 |
| <i>IFNAR2</i>  | 21  | 34582231  | 34656831  | 221            | 6.83    | 4.21E-12 | 8.95E-09 |
| <i>CCR2</i>    | 3   | 46375235  | 46422413  | 136            | 6.53    | 3.26E-11 | 6.24E-08 |
| <i>CCR5</i>    | 3   | 46391633  | 46437697  | 133            | 5.69    | 6.28E-09 | 1.01E-05 |
| <i>OAS3</i>    | 12  | 113356249 | 113431056 | 265            | 5.69    | 6.35E-09 | 1.01E-05 |
| <i>OAS1</i>    | 12  | 113324739 | 113377712 | 157            | 5.28    | 6.57E-08 | 9.67E-05 |
| <i>SPPL2C</i>  | 17  | 43902256  | 43944438  | 281            | 4.63    | 1.81E-06 | 2.47E-03 |

|               |    |           |           |      |      |          |          |
|---------------|----|-----------|-----------|------|------|----------|----------|
| <i>CRHR1</i>  | 17 | 43677710  | 43933194  | 1203 | 4.59 | 2.24E-06 | 2.86E-03 |
| <i>STH</i>    | 17 | 44056616  | 44097060  | 225  | 4.57 | 2.43E-06 | 2.91E-03 |
| <i>MAPT</i>   | 17 | 43951702  | 44125700  | 901  | 4.41 | 5.09E-06 | 5.73E-03 |
| <i>UBE2D1</i> | 10 | 60074739  | 60150513  | 188  | 4.40 | 5.44E-06 | 5.78E-03 |
| <i>KANSL1</i> | 17 | 44087282  | 44322740  | 941  | 4.20 | 1.35E-05 | 1.36E-02 |
| <i>TFAM</i>   | 10 | 60124903  | 60178990  | 145  | 4.02 | 2.94E-05 | 2.81E-02 |
| <i>CCRL2</i>  | 3  | 46428721  | 46474488  | 195  | 3.99 | 3.33E-05 | 3.03E-02 |
| <i>IBA57</i>  | 1  | 228333429 | 228389958 | 118  | 3.98 | 3.52E-05 | 3.06E-02 |
| <i>IL10RB</i> | 21 | 34618665  | 34689539  | 230  | 3.92 | 4.36E-05 | 3.63E-02 |
| <i>COX10</i>  | 17 | 13952719  | 14131996  | 549  | 3.87 | 5.37E-05 | 4.28E-02 |
| <i>NCR2</i>   | 6  | 41283528  | 41338625  | 328  | 3.83 | 6.32E-05 | 4.84E-02 |

**Note:** SNP =single nucleotide polymorphism, CHR = chromosome, POS = position, FDR = False discovery rate.

**Supplemental Table S5. Significant enriched pathways associated with severe COVID-19 identified from MAGMA-based pathway enrichment analysis**

| ID | KEGG ID  | Pathway names                                              | Number of genes | Beta | SE   | P value  |
|----|----------|------------------------------------------------------------|-----------------|------|------|----------|
| 1  | hsa00533 | Glycosaminoglycan biosynthesis - keratan sulfate           | 14              | 0.66 | 0.20 | 5.84E-04 |
| 2  | hsa05168 | Herpes simplex virus 1 infection                           | 183             | 0.16 | 0.06 | 2.13E-03 |
| 3  | hsa00601 | Glycosphingolipid biosynthesis - lacto and neolacto series | 27              | 0.43 | 0.15 | 2.69E-03 |
| 4  | hsa04390 | Hippo signaling pathway                                    | 153             | 0.17 | 0.06 | 2.87E-03 |
| 5  | hsa05162 | Measles                                                    | 131             | 0.19 | 0.07 | 3.13E-03 |
| 6  | hsa05164 | Influenza A                                                | 167             | 0.15 | 0.06 | 6.36E-03 |
| 7  | hsa04064 | NF-kappa B signaling pathway                               | 92              | 0.19 | 0.08 | 9.44E-03 |
| 8  | hsa04621 | NOD-like receptor signaling pathway                        | 167             | 0.13 | 0.06 | 1.11E-02 |
| 9  | hsa04625 | C-type lectin receptor signaling pathway                   | 104             | 0.16 | 0.07 | 1.13E-02 |
| 10 | hsa05143 | African trypanosomiasis                                    | 34              | 0.28 | 0.12 | 1.33E-02 |
| 11 | hsa05160 | Hepatitis C                                                | 131             | 0.14 | 0.07 | 1.63E-02 |
| 12 | hsa04392 | Hippo signaling pathway - multiple species                 | 28              | 0.28 | 0.13 | 1.80E-02 |
| 13 | hsa00603 | Glycosphingolipid biosynthesis - globo and isoglobo series | 15              | 0.48 | 0.23 | 1.81E-02 |
| 14 | hsa04137 | Mitophagy - animal                                         | 64              | 0.17 | 0.08 | 1.87E-02 |
| 15 | hsa04630 | JAK-STAT signaling pathway                                 | 158             | 0.12 | 0.07 | 3.50E-02 |
| 16 | hsa04668 | TNF signaling pathway                                      | 110             | 0.13 | 0.07 | 3.95E-02 |

|    |          |                                        |     |      |      |          |
|----|----------|----------------------------------------|-----|------|------|----------|
| 17 | hsa00471 | D-Glutamine and D-glutamate metabolism | 5   | 0.57 | 0.34 | 4.47E-02 |
| 18 | hsa04060 | Cytokine-cytokine receptor interaction | 286 | 0.09 | 0.05 | 4.67E-02 |
| 19 | hsa05132 | Salmonella infection                   | 81  | 0.14 | 0.09 | 4.92E-02 |

**Supplemental Table S6. The 16 significant genes associated with severe COVID-19 identified by S-MultiXcan analysis based on 49 tissues from GTEx consortium**

| Gene name      | CHR   | START     | STOP      | P value  | FDR      |
|----------------|-------|-----------|-----------|----------|----------|
| <i>LZTFL1</i>  | chr3  | 45864808  | 45957216  | 1.08E-30 | 2.41E-26 |
| <i>SLC6A20</i> | chr3  | 45796941  | 45838039  | 2.19E-29 | 2.44E-25 |
| <i>CCR9</i>    | chr3  | 45927996  | 45944667  | 4.16E-29 | 3.10E-25 |
| <i>CXCR6</i>   | chr3  | 45984973  | 45989845  | 1.56E-28 | 8.71E-25 |
| <i>XCR1</i>    | chr3  | 46062291  | 46068979  | 4.20E-16 | 1.88E-12 |
| <i>FYCO1</i>   | chr3  | 45959391  | 46037316  | 1.53E-14 | 5.69E-11 |
| <i>CCR3</i>    | chr3  | 46283872  | 46308197  | 8.15E-13 | 2.60E-09 |
| <i>CCR1</i>    | chr3  | 46243200  | 46249832  | 1.13E-11 | 3.15E-08 |
| <i>DNAH3</i>   | chr16 | 20944476  | 21170762  | 4.44E-10 | 1.10E-06 |
| <i>CCR2</i>    | chr3  | 46395235  | 46402413  | 1.16E-09 | 2.59E-06 |
| <i>ABO</i>     | chr9  | 136130563 | 136150630 | 1.36E-07 | 2.76E-04 |
| <i>IFNAR2</i>  | chr21 | 34602231  | 34636831  | 3.28E-07 | 6.10E-04 |
| <i>IL10RB</i>  | chr21 | 34638665  | 34669539  | 8.28E-07 | 1.42E-03 |
| <i>CCR5</i>    | chr3  | 46411633  | 46417697  | 1.22E-06 | 1.95E-03 |
| <i>OAS3</i>    | chr12 | 113376249 | 113411056 | 2.83E-06 | 4.21E-03 |
| <i>CCRL2</i>   | chr3  | 46448721  | 46454488  | 4.61E-06 | 6.43E-03 |

**Note:** CHR = chromosome, START = start position on chromosome, STOP = stop position on chromosome, FDR = False discovery rate.

**Supplemental Table S7. The eight significant genes associated with severe COVID-19 identified by S-PrediXcan analysis based on lung and blood tissues**

| Gene name    | CHR   | START    | STOP     | Z score | P value  | FDR      | Tissue |
|--------------|-------|----------|----------|---------|----------|----------|--------|
| <i>CCR9</i>  | chr3  | 45927996 | 45944667 | 11.69   | 1.47E-31 | 1.79E-27 | Blood  |
| <i>PGLS</i>  | chr19 | 17622278 | 17632097 | -4.64   | 3.43E-06 | 2.09E-02 | Blood  |
| <i>CXCR6</i> | chr3  | 45984973 | 45989845 | -10.55  | 5.10E-26 | 7.41E-22 | Lung   |

|               |       |           |           |       |          |          |      |
|---------------|-------|-----------|-----------|-------|----------|----------|------|
| <i>CCR5</i>   | chr3  | 46411633  | 46417697  | -5.46 | 4.85E-08 | 3.52E-04 | Lung |
| <i>FOXP4</i>  | chr6  | 41514164  | 41570122  | 4.88  | 1.08E-06 | 5.23E-03 | Lung |
| <i>IL10RB</i> | chr21 | 34638665  | 34669539  | 4.74  | 2.19E-06 | 7.95E-03 | Lung |
| <i>FYCO1</i>  | chr3  | 45959391  | 46037316  | 4.65  | 3.35E-06 | 8.45E-03 | Lung |
| <i>ABO</i>    | chr9  | 136130563 | 136150630 | 4.64  | 3.49E-06 | 8.45E-03 | Lung |

**Note:** CHR = chromosome, START = start position on chromosome, STOP = stop position on chromosome, FDR = False discovery rate.

**Supplemental Table S8. The biological pathways enriched by 34 risk genes associated with severe COVID-19**

| ID | KEGG ID  | Pathway names                                   | Number of genes | Ratio | P Value  | FDR      |
|----|----------|-------------------------------------------------|-----------------|-------|----------|----------|
| 1  | hsa04060 | Cytokine-cytokine receptor interaction          | 294             | 10.89 | 3.89E-08 | 1.27E-05 |
| 2  | hsa04062 | Chemokine signaling pathway                     | 189             | 13.17 | 5.12E-07 | 8.35E-05 |
| 3  | hsa05160 | Hepatitis C                                     | 131             | 10.86 | 4.29E-04 | 3.60E-02 |
| 4  | hsa05162 | Measles                                         | 132             | 10.78 | 4.42E-04 | 3.60E-02 |
| 5  | hsa04621 | NOD-like receptor signaling pathway             | 168             | 8.47  | 1.10E-03 | 6.36E-02 |
| 6  | hsa05164 | Influenza A                                     | 171             | 8.32  | 1.17E-03 | 6.36E-02 |
| 7  | hsa05168 | Herpes simplex infection                        | 185             | 7.69  | 1.57E-03 | 6.51E-02 |
| 8  | hsa05167 | Kaposi sarcoma-associated herpesvirus infection | 186             | 7.65  | 1.60E-03 | 6.51E-02 |
| 9  | hsa05169 | Epstein-Barr virus infection                    | 201             | 7.08  | 2.13E-03 | 0.077    |
| 10 | hsa05163 | Human cytomegalovirus infection                 | 225             | 6.32  | 3.20E-03 | 0.104    |

**Supplemental Table S9. The percentage of three severe COVID-19-risk genes expressed in all 13 distinct cell types in PBMCs**

| Cell types           | <i>CXCR6</i> | <i>CCR1</i> | <i>ABO</i> |
|----------------------|--------------|-------------|------------|
| Effector CD8+T cells | 0.007        | 0.008       | 0.002      |

|                    |          |       |       |
|--------------------|----------|-------|-------|
| Memory CD8+T cells | 0.021    | 0.014 | 0.004 |
| Naive CD8+T cells  | 0.013    | 0.01  | 0.003 |
| Naive CD4+T cells  | 3.08E-04 | 0.001 | 0.012 |
| Memory CD4+T cells | 0.004    | 0.002 | 0.014 |
| CD14+ monocytes    | 8.84E-05 | 0.099 | 0.002 |
| CD16+ monocytes    | 2.42E-04 | 0.079 | 0.002 |
| NK                 | 3.19E-03 | 0.012 | 0.001 |
| Naive B cells      | 3.27E-04 | 0.004 | 0.007 |
| Dendritic cells    | 1.63E-04 | 0.051 | 0.007 |
| Megakaryocytes     | 1.64E-03 | 0.004 | 0.112 |
| CD34+Progenitors   | 1.17E-03 | 0.011 | 0.039 |
| Mature B cells     | 0        | 0.024 | 0     |

428

429

430

**Supplemental Table S10. Summary of inflammatory and cytokine-related genes and genes in two identified KEGG pathways**

| Categories                 | Gene lists                                                                                                                                                                                                                                                                                                                                                                                                                                                                                                                                                                                                                                                                                                                                                                                                                                                                                                                                                                                                                                                                                                                                                                                                                                                                                                                     | Resources      |
|----------------------------|--------------------------------------------------------------------------------------------------------------------------------------------------------------------------------------------------------------------------------------------------------------------------------------------------------------------------------------------------------------------------------------------------------------------------------------------------------------------------------------------------------------------------------------------------------------------------------------------------------------------------------------------------------------------------------------------------------------------------------------------------------------------------------------------------------------------------------------------------------------------------------------------------------------------------------------------------------------------------------------------------------------------------------------------------------------------------------------------------------------------------------------------------------------------------------------------------------------------------------------------------------------------------------------------------------------------------------|----------------|
| Inflammatory-related genes | <i>ABCA1, ABII, ACVR1B, ACVR2A, ADGRE1, ADM, ADORA2B, ADRM1, AHR, APLNR, AQP9, ATP2A2, ATP2B1, ATP2C1, AXL, BDKRB1, BEST1, BST2, BTG2, C3AR1, C5AR1, CALCRL, CCL17, CCL2, CCL20, CCL22, CCL24, CCL5, CCL7, CCR7, CCRL2, CD14, CD40, CD48, CD55, CD69, CD70, CD82, CDKN1A, CHST2, CLEC5A, CMKLR1, CSF1, CSF3, CSF3R, CX3CLI, CXCL10, CXCL11, CXCL6, CXCL8, CXCL9, CXCR6, CYBB, DCBLD2, EBI3, EDN1, EIF2AK2, EMP3, EREG, F3, FFAR2, FPR1, FZD5, GABBRI, GCH1, GNA15, GNAI3, GPIBA, GPC3, GPR132, GPR183, HAS2, HBEGF, HIF1A, HPN, HRH1, ICAM1, ICAM4, ICOSLG, IFITM1, IFNAR1, IFNGR2, IL10, IL10RA, IL12B, IL15, IL15RA, IL18, IL18R1, IL18RAP, IL1A, IL1B, IL1R1, IL2RB, IL4R, IL6, IL7R, INHBA, IRAK2, IRF1, IRF7, ITGA5, ITGB3, ITGB8, KCNA3, KCNJ2, KCNMB2, KIF1B, KLF6, LAMP3, LCK, LCP2, LDLR, LIF, LPAR1, LTA, LY6E, LYN, MARCO, MEFV, MEP1A, MET, MMP14, MSRI, MXD1, MYC, NAMPT, NDP, NFKB1, NFKBIA, NLRP3, NMI, NMURI, NOD2, NPFFR2, OLR1, OPRK1, OSM, OSMR, P2RX4, P2RX7, P2RY2, PCDH7, PDE4B, PDPN, PIK3R5, PLAUR, PROK2, PSEN1, PTAFR, PTGER2, PTGER4, PTGIR, PTPRE, PVR, RAF1, RASGRP1, RELA, RGS1, RGS16, RHOG, RIPK2, RNF144B, ROS1, RTP4, SCARF1, SCN1B, SELE, SELENOS, SELL, SEMA4D, SERPINE1, SGMS2, SLAMF1, SLC11A2, SLC1A2, SLC28A2, SLC31A1, SLC31A2, SLC4A4, SLC7A1, SLC7A2, SPHK1, SRI, STAB1, TACRI,</i> | PMID: 33657410 |

|                        |                                                                                                                                                    |                                                                                                                                                          |
|------------------------|----------------------------------------------------------------------------------------------------------------------------------------------------|----------------------------------------------------------------------------------------------------------------------------------------------------------|
|                        | <i>TACR3, TAPBP, TIMP1, TLR1, TLR2, TLR3, TNFAIP6, TNFRSF1B, TNFRSF9, TNFSF10, TNFSF15, TNFSF9, TPBG, VIP</i>                                      |                                                                                                                                                          |
| Cytokine-related genes | <i>IL2, IL7, CSF3, CXCL10, CCL2, CCL3, TNF, TFTN1, IL6</i>                                                                                         | PMID: 32192578                                                                                                                                           |
| Cytokine-related genes | <i>CXCL10, CCL7, IL1RN, CSF1, IFNG, IL6, IL2RA, IL10, IL18, HGF, CXCL9, CSF3, CCL3, CCL27</i>                                                      | Exuberant elevation of IP-10, MCP-3 and IL-1ra during SARS-CoV-2 infection is associated with disease severity and fatal outcome, 2020.3, <i>MedRxiv</i> |
| Cytokine-related genes | <i>TGFB1</i>                                                                                                                                       | PMID: 32346099                                                                                                                                           |
| Cytokine-related genes | <i>IL1B, LTA, IFNG, CSF1, CSF2, LTB, IL6, TNFSF13, IL18, IL2, IL4</i>                                                                              | PMID: 32377375                                                                                                                                           |
| Cytokine-related genes | <i>IL1B, IL18, IL6, TNF, CCL2, CCL7, CCL12, CXCL8, CCL3, CXCL9, CXCL10, CXCL11</i>                                                                 | PMID: 32505227                                                                                                                                           |
| Cytokine-related genes | <i>IL1B, IL6, TNF, CCL2, CCL3, CCL4, CCL7, CXCL9, CXCL10, CXCL11, CXCL1, CXCL2, CXCL3, CXCL8, CCL3L1, CCL8, CXCL16</i>                             | PMID: 32398875                                                                                                                                           |
| Cytokine-related genes | <i>IL6, CXCL8</i>                                                                                                                                  | PMID: 32434211                                                                                                                                           |
| Cytokine-related genes | <i>CSF2, IL6, IFNG</i>                                                                                                                             | Pathogenic T-cells and inflammatory monocytes incite inflammatory storms in severe COVID-19 patients, 2020.6, National Science Review                    |
| Cytokine-related genes | <i>IL6, IL10, CXCL8, CXCL10, IFNG, IFNA1</i>                                                                                                       | A consensus Covid-19 immune signature combines immuno-protection with discrete sepsis-like traits associated with poor prognosis., 2020.6, medRxiv       |
| Cytokine-related genes | <i>CXCL10, CXCL9, CCL2, IL1RN, CCL5, CCL11, TNF, HGF, IFNA2</i>                                                                                    | PMID: 32669297                                                                                                                                           |
| Cytokine-related genes | <i>TNF, IL1B, IL18</i>                                                                                                                             | PMID: 32651212                                                                                                                                           |
| Cytokine-related genes | <i>TNF, CCL3, CCL4, CCL20, IL1B, IL6, IL10, CXCL2, CXCL3, CXCL8, CXCL9, CCL3L1, CCL4L2</i>                                                         | PMID: 32764665                                                                                                                                           |
| Cytokine-related genes | <i>IL6, CXCL10, CCL7, HGF, OSM, TNFSF14, IFNA1, SAI00A12, FGF19, CXCL5, CCL4, CCL8, CCL19, CXCL11, CCL3, IL18RI, CSF1, TNF, CCL20, TGFA, IFNB1</i> | PMID: 32788292                                                                                                                                           |

|                                                                                |                                                                                                                                                                                                                                                                                                                                                                                                                                                                                                                                                                                                                                                                                                                                                                                                                                                                                                                                                                                                                                                                                                                                                                                                                                                                                                                                                                                                                                                                                                                                                                                                                                                                                                                                                                                                                                                                                                                                                                                                                                                                                                                                           |                                   |
|--------------------------------------------------------------------------------|-------------------------------------------------------------------------------------------------------------------------------------------------------------------------------------------------------------------------------------------------------------------------------------------------------------------------------------------------------------------------------------------------------------------------------------------------------------------------------------------------------------------------------------------------------------------------------------------------------------------------------------------------------------------------------------------------------------------------------------------------------------------------------------------------------------------------------------------------------------------------------------------------------------------------------------------------------------------------------------------------------------------------------------------------------------------------------------------------------------------------------------------------------------------------------------------------------------------------------------------------------------------------------------------------------------------------------------------------------------------------------------------------------------------------------------------------------------------------------------------------------------------------------------------------------------------------------------------------------------------------------------------------------------------------------------------------------------------------------------------------------------------------------------------------------------------------------------------------------------------------------------------------------------------------------------------------------------------------------------------------------------------------------------------------------------------------------------------------------------------------------------------|-----------------------------------|
| Cytokine-related genes                                                         | <i>TNF</i>                                                                                                                                                                                                                                                                                                                                                                                                                                                                                                                                                                                                                                                                                                                                                                                                                                                                                                                                                                                                                                                                                                                                                                                                                                                                                                                                                                                                                                                                                                                                                                                                                                                                                                                                                                                                                                                                                                                                                                                                                                                                                                                                | PMID: 32877699                    |
| Cytokine-related genes                                                         | <i>IL6, IL8, TNF, IL1B</i>                                                                                                                                                                                                                                                                                                                                                                                                                                                                                                                                                                                                                                                                                                                                                                                                                                                                                                                                                                                                                                                                                                                                                                                                                                                                                                                                                                                                                                                                                                                                                                                                                                                                                                                                                                                                                                                                                                                                                                                                                                                                                                                | PMID: 32839624                    |
| Cytokine-related genes                                                         | <i>IL17C, TNFSF10, FGF7, XCLI, FGF13, LIF, TGFB3, INHBE, CERS1, TXLNA, IFNW1, IL22, XCL2, CCL25, CCL16, CD40LG, IL20, FASLG, TPO, SCYL3, PF4V1, TNFSF8, GDF15, IL1A, VEGFA, GDF7, BMP6, PDGFA, IL21, ABCD-1, ABCD-2, PDGFB, TNFSF4, FAM19A1, HBEGF, PDGFD, IL12RB2, GH1, VEGFB, MIP3B, IL27, PF4, BMP8B, TNFSF12, IL15, SCYL2, SCYL1, TSLP, GDF11, SDF1B, INHBA, PPBP, FGF11, IFNG-AS1, FGF22, VEGFC, CCL18, TNFSF11, IL12A, EB13, AMH, IL26, IL32, PDGFC, FGF23, IGF1, IL1F11, CCL28, CLCF1, TNFSF9, BMP3, IL24, GDF10, CXCL6, GDF9, IL23A, IL16, CD70, IL5, FGF9, IFNLI, TSC1, FGF2, IL23R, IL1G, SPP1, IL12RBI, BMP4, IL13, TPARI, TGFB2, FAM19A2, AGIF3, EDA, MIF, TNFSF13B, BMP7, FGF18, CCL23</i>                                                                                                                                                                                                                                                                                                                                                                                                                                                                                                                                                                                                                                                                                                                                                                                                                                                                                                                                                                                                                                                                                                                                                                                                                                                                                                                                                                                                                                   | KEGG database<br>(PMID: 10592173) |
| Genes in the KEGG pathway of cytokine-cytokine receptor interaction (hsa04060) | <i>GDF11, CCL26, CXCL13, CXCR6, TNFSF13B, CCR9, CCL27, EDAR, IL24, IL17F, TNFRSF13C, CCRI, CCR3, CCR4, CCR5, CCR6, CCR7, CCR8, CNTF, CNTRF, ACVR1C, IL17RE, IL31RA, CSF1, CSF1R, CSF2, CSF2RB, CSF3, CSF3R, CSH1, CSH2, IL34, CTF1, IL23R, GDF7, CX3CR1, IFNLR1, EDA, EPO, EPOR, TNFRSF13B, CLCF1, IL17RA, IL27, IL36RN, GDF1, GDF2, MSTN, GDF9, GDF10, AMH, GH1, GH2, AMHR2, GHR, IL36B, IL37, IL36A, IL17C, IL17B, TNFRSF21, BMP10, CCR10, IFNL2, IFNL3, IFNLI, XCR1, CXCR3, CXCL17, CXCL1, CXCL2, CXCL3, IL19, IFNE, IFNA1, IFNA2, IFNA4, IFNA5, IFNA6, IFNA7, IFNA8, IFNA10, IFNA13, IFNA14, IFNA16, IFNA17, IFNA21, IFNAR1, IFNAR2, IFNB1, IFNG, IFNGR1, IFNGR2, IFNW1, BMP8A, FAS, IL1A, IL1B, IL1R1, IL1RAP, IL1RN, IL2, IL2RA, FASLG, IL2RB, IL2RG, IL3, IL4, IL4R, IL5, IL5RA, IL6, IL6R, IL6ST, IL7, IL7R, CXCL8, CXCR1, IL9, CXCR2, IL10, IL10RA, IL10RB, IL11, IL11RA, IL12A, IL12B, IL12RBI, IL12RB2, IL13, IL13RA1, IL13RA2, IL15, IL15RA, IL16, TNFRSF9, IL17A, IL18, INHA, INHBA, INHBB, INHBC, CXCL10, IL31, CCL4L1, GDF6, LEP, LEPR, LIF, LIFR, LTA, LTB, LTBR, CCL3L3, CXCL9, MPL, NGF, NGFR, NODAL, TNFRSF11B, OSM, IL20, IL21R, IL22, TNFRSF12A, ACKR4, IL23A, PF4, PF4V1, IL17D, IL20RA, IL20RB, PPBP, TNFRSF19, IL17RB, IL26, PRL, PRLR, IL36G, CCL28, IFNK, ACKR3, CXCL16, IL22RA1, IL21, EDA2R, TNFRSF17, CCLI, CCL2, CCL3, CCL3L1, CCL4, CCL5, CCL7, CCL8, CCL11, CCL13, CCL14, CCL15, CCL16, CCL17, CCL18, CCL19, CCL20, CCL21, CCL22, CCL23, CCL24, CCL25, CXCL6, CXCL11, CXCL5, XCL1, CX3CL1, CXCL12, CXCR5, IL25, BMP2, BMP3, BMP4, BMP5, BMP6, BMP7, BMP8B, BMPR1A, BMPR1B, BMPR2, XCL2, TGFB1, TGFB2, TGFB3, TGFBRI, TGFBRI2, THPO, TNF, TNFRSF1A, TNFRSF1B, TNFSF4, CCR2, TNFRSF4, IL1R2, CXCR4, GDF5, INHBE, IL1F10, IL17RC, RELT, TSLP, TNFSF11, TNFRSF25, TNFSF14, TNFSF13, TNFSF12, TNFSF10, TNFSF9, TNFRSF14, TNFRSF6B, TNFRSF18, TNFRSF11A, TNFRSF10D, TNFRSF10C, TNFRSF10B, TNFRSF10A, IL18RAP, IL1RL2, IL18R1, TNFSF18, ACVR1, IL33, ACVR1B, IL1RL1, OSMR, ACVR2A, CD4, BMP15, IL32, ACVR2B, CD27, ACVRL1, TNFRSF8, TNFSF8, IL27RA, GDF15, CXCL14, CCL4L2, GDF3, CD40, CD40LG, CD70, TNFSF15</i> | KEGG database<br>(PMID: 10592173) |
| Genes in the KEGG pathway of chemokine signaling pathway (hsa04062)            | <i>AKT3, RASGRP2, CCL26, VAV3, CXCL13, CXCR6, GNB5, ADCY1, ADCY2, CCR9, CCL27, ADCY3, ADCY5, ADCY6, ADCY7, ADCY8, CHUK, ADCY9, CCRI, CCR3, CCR4, CCR5, CCR6, CCR7, CCR8, GRK7, CRK, CRKL, PIK3R6, CX3CR1, ADRBK1, ADRBK2, DOCK2, ADCY4, AKT1, AKT2, PTK2B, FGR, FOXO3, PLCB1, PIK3R5, SHC2, GNAI1, GNAI2, GNAI3, GNB1, GNB2, GNB3, GNG3, GNG4, GNG5, GNG7, GNG10, GNG11, NGGT1, NGGT2, CCR10, XCR1, CXCR3, GRK4, GRK5, GRK6, GRB2, CXCL1, CXCL2, CXCL3, GSK3A, GSK3B, HCK, HRAS, IKBKB, CXCL8, CXCR1, CXCR2, CXCL10, ITK, JAK2, JAK3, KRAS, RHOA, CCL4L1, SHC4, LYN, ARRB1, ARRB2, CCL3L3, CXCL9, NFKB1, NFKBIA, NFKBIB, NRAS, PAK1, GNG13, PF4, PF4V1, PIK3CA, PIK3CB, PIK3CD, PIK3CG, PIK3R1, PIK3R2, PLCB2, PLCB3, PLCB4, SHC3, GNG2, PPBP, PRKACA, PRKACB, PRKACG, PRKCB, PRKCD, PRKCZ, MAPK1, MAPK3, GNG12, MAP2K1, PARD3, CCL28, BAD, PTK2, PREX1, CXCL16, PXN, RAC1, RAC2, RAF1, RAPIA, RAPIB, GNB4, RELA, ROCK1, CCL1, CCL2, CCL3, CCL3L1, CCL4, CCL5, CCL7, CCL8, CCL11, CCL13, CCL14, CCL15, CCL16, CCL17, CCL18, CCL19, CCL20, CCL21, CCL22, CCL23, CCL24, CCL25, CXCL6, CXCL11, CXCL5, XCL1, CX3CL1, CXCL12, CXCR5, SHC1, NCF1, SOS1, SOS2, SRC, BRAF, STAT1, STAT2, STAT3, STAT5B, XCL2, TIAMI, CCR2, VAV1, VAV2, WAS, CXCR4, PIK3R3, IKBKG, WASL, GNG8, ROCK2, CXCL14, CCL4L2, BCARI, ELMO1, CDC42</i>                                                                                                                                                                                                                                                                                                                                                                                                                                                                                                                                                                                                                                                                                                                                                                                                                      | KEGG database<br>(PMID: 10592173) |

431  
432  
433

**Supplemental Table S11. Highly-expressed inflammatory and cytokine genes among *CCR1+* *CD16+* monocytes**

| Gene           | T score | Fold change | P value  | FDR      |
|----------------|---------|-------------|----------|----------|
| <i>ADM</i>     | 6.26    | 1.72        | 5.17E-10 | 2.97E-08 |
| <i>AHR</i>     | 5.16    | 1.71        | 2.83E-07 | 1.07E-05 |
| <i>AQP9</i>    | 5.70    | 1.96        | 1.47E-08 | 7.07E-07 |
| <i>C3AR1</i>   | 6.30    | 1.56        | 3.99E-10 | 2.31E-08 |
| <i>CCL3</i>    | 6.16    | 1.55        | 9.43E-10 | 5.26E-08 |
| <i>CCL3L1</i>  | 5.57    | 1.71        | 3.01E-08 | 1.37E-06 |
| <i>CCL4L2</i>  | 3.06    | 1.92        | 2.28E-03 | 2.49E-02 |
| <i>CD14</i>    | 18.55   | 2.14        | 2.02E-68 | 1.57E-64 |
| <i>CD82</i>    | 3.98    | 1.59        | 7.16E-05 | 1.43E-03 |
| <i>CSF3R</i>   | 7.18    | 1.56        | 1.16E-12 | 9.94E-11 |
| <i>CXCL10</i>  | 4.17    | 3.36        | 3.29E-05 | 7.14E-04 |
| <i>CXCL2</i>   | 7.12    | 2.72        | 1.83E-12 | 1.53E-10 |
| <i>CXCL3</i>   | 3.33    | 3.33        | 9.03E-04 | 1.19E-02 |
| <i>CXCL8</i>   | 5.56    | 1.52        | 3.29E-08 | 1.48E-06 |
| <i>EIF2AK2</i> | 7.87    | 1.95        | 7.19E-15 | 7.88E-13 |
| <i>EREG</i>    | 6.05    | 2.02        | 1.92E-09 | 1.02E-07 |
| <i>FFAR2</i>   | 5.56    | 1.92        | 3.29E-08 | 1.48E-06 |
| <i>FPRI</i>    | 10.14   | 1.53        | 2.60E-23 | 5.69E-21 |
| <i>GPR183</i>  | 2.99    | 1.69        | 2.85E-03 | 2.99E-02 |
| <i>HBEGF</i>   | 4.55    | 1.70        | 5.84E-06 | 1.57E-04 |
| <i>IL1B</i>    | 6.66    | 1.58        | 3.89E-11 | 2.65E-09 |
| <i>IL1RN</i>   | 8.87    | 2.68        | 2.54E-18 | 3.63E-16 |
| <i>IL27</i>    | 2.90    | 2.73        | 3.75E-03 | 3.67E-02 |
| <i>IL4R</i>    | 3.29    | 1.58        | 1.04E-03 | 1.33E-02 |
| <i>ITGA5</i>   | 2.85    | 1.53        | 4.39E-03 | 4.17E-02 |
| <i>LDLR</i>    | 4.06    | 1.72        | 5.11E-05 | 1.05E-03 |
| <i>MARCO</i>   | 7.60    | 1.66        | 5.50E-14 | 5.44E-12 |



|                |      |      |          |          |
|----------------|------|------|----------|----------|
| <i>MYC</i>     | 3.12 | 1.90 | 1.83E-03 | 2.11E-02 |
| <i>NLRP3</i>   | 4.92 | 1.61 | 9.51E-07 | 3.16E-05 |
| <i>OSM</i>     | 2.92 | 1.82 | 3.53E-03 | 3.51E-02 |
| <i>PTAFR</i>   | 6.99 | 1.85 | 4.44E-12 | 3.42E-10 |
| <i>RTP4</i>    | 3.35 | 1.80 | 8.32E-04 | 1.11E-02 |
| <i>SELL</i>    | 9.16 | 1.94 | 1.92E-19 | 3.18E-17 |
| <i>SPHK1</i>   | 4.81 | 2.25 | 1.71E-06 | 5.32E-05 |
| <i>STAB1</i>   | 7.78 | 2.40 | 1.56E-14 | 1.65E-12 |
| <i>TNFAIP6</i> | 3.44 | 3.33 | 5.94E-04 | 8.43E-03 |
| <i>CCL2</i>    | 3.36 | 5.74 | 8.08E-04 | 1.08E-02 |

434

435

436

**Supplemental Table S12. Pathway enrichment analysis of 351 highly-expressed genes among *CCR1*+ *CD16*+ monocytes.**

| Pathway name                           | Gene size | Enrichment ratio | P Value  | FDR      |
|----------------------------------------|-----------|------------------|----------|----------|
| NOD-like receptor signaling pathway    | 168       | 4.25             | 4.32E-07 | 9.07E-05 |
| Influenza A                            | 171       | 4.17             | 5.56E-07 | 9.07E-05 |
| Cytokine-cytokine receptor interaction | 294       | 3.14             | 1.61E-06 | 1.75E-04 |
| Hematopoietic cell lineage             | 97        | 5.19             | 2.83E-06 | 2.31E-04 |
| Pertussis                              | 76        | 5.52             | 1.12E-05 | 7.32E-04 |
| Salmonella infection                   | 86        | 4.88             | 3.39E-05 | 1.84E-03 |
| Legionellosis                          | 55        | 6.10             | 4.16E-05 | 1.94E-03 |
| Staphylococcus aureus infection        | 56        | 5.99             | 4.75E-05 | 1.94E-03 |
| Complement and coagulation cascades    | 79        | 4.78             | 9.93E-05 | 3.60E-03 |
| Toll-like receptor signaling pathway   | 104       | 4.03             | 1.73E-04 | 5.63E-03 |
| TNF signaling pathway                  | 110       | 3.81             | 2.74E-04 | 8.13E-03 |
| NF-kappa B signaling pathway           | 95        | 3.98             | 4.09E-04 | 1.11E-02 |

|                                                 |     |      |          |          |
|-------------------------------------------------|-----|------|----------|----------|
| Malaria                                         | 49  | 5.14 | 1.01E-03 | 2.52E-02 |
| Hepatitis C                                     | 131 | 3.20 | 1.10E-03 | 2.56E-02 |
| Herpes simplex infection                        | 185 | 2.72 | 1.50E-03 | 3.26E-02 |
| Chemokine signaling pathway                     | 189 | 2.66 | 1.80E-03 | 3.67E-02 |
| Amoebiasis                                      | 96  | 3.50 | 1.98E-03 | 3.79E-02 |
| Human cytomegalovirus infection                 | 225 | 2.42 | 2.71E-03 | 4.91E-02 |
| Chagas disease (American trypanosomiasis)       | 102 | 3.29 | 2.90E-03 | 4.97E-02 |
| Phagosome                                       | 152 | 2.76 | 3.32E-03 | 5.42E-02 |
| Cytosolic DNA-sensing pathway                   | 63  | 4.00 | 3.71E-03 | 5.77E-02 |
| Measles                                         | 132 | 2.86 | 4.16E-03 | 6.17E-02 |
| Transcriptional misregulation in cancer         | 186 | 2.48 | 4.78E-03 | 6.77E-02 |
| IL-17 signaling pathway                         | 93  | 3.16 | 6.57E-03 | 8.92E-02 |
| Glycosaminoglycan degradation                   | 19  | 6.63 | 9.74E-03 | 1.27E-01 |
| JAK-STAT signaling pathway                      | 162 | 2.33 | 1.51E-02 | 1.90E-01 |
| Bladder cancer                                  | 41  | 4.09 | 1.59E-02 | 1.92E-01 |
| Acute myeloid leukemia                          | 66  | 3.18 | 2.01E-02 | 2.19E-01 |
| Inflammatory bowel disease (IBD)                | 65  | 3.23 | 1.90E-02 | 2.19E-01 |
| Rheumatoid arthritis                            | 90  | 2.80 | 2.01E-02 | 2.19E-01 |
| RIG-I-like receptor signaling pathway           | 70  | 3.00 | 2.53E-02 | 2.66E-01 |
| Tuberculosis                                    | 179 | 2.11 | 2.70E-02 | 2.75E-01 |
| Nicotinate and nicotinamide metabolism          | 30  | 4.20 | 3.37E-02 | 2.97E-01 |
| PPAR signaling pathway                          | 74  | 2.84 | 3.12E-02 | 2.97E-01 |
| Osteoclast differentiation                      | 128 | 2.29 | 3.29E-02 | 2.97E-01 |
| Leishmaniasis                                   | 74  | 2.84 | 3.12E-02 | 2.97E-01 |
| Kaposi sarcoma-associated herpesvirus infection | 186 | 2.03 | 3.34E-02 | 2.97E-01 |

|                                |     |      |          |          |
|--------------------------------|-----|------|----------|----------|
| Antifolate resistance          | 31  | 4.06 | 3.67E-02 | 3.15E-01 |
| Th17 cell differentiation      | 107 | 2.35 | 4.22E-02 | 3.52E-01 |
| Glycosphingolipid biosynthesis | 15  | 5.59 | 4.84E-02 | 3.85E-01 |

437

438

### Supplemental Table S13. Druggable proteins collected from the ChEMBL database

| Categories                     | Protein lists                                                                                                                                                                                                                                                                                                                                                                                                                                                                                                                                                                                                                                                                                                                                                                                                                                                                                                                                                                                                                                                                                                                                                                                                                                                                                                                                                                                                                                                                                                                                                                                                                                                                                                                                                                                                                                                                                                                                                                                                                                                                                                                                                                                                                                                                                                                                                                                                                                                                                                                                                                                                                                                                                                                                                                                                                                                                                                                                                                                                                                                                                                                                                                                                                                                                                                                                                                                                                                                                                                                                                                     | Resources      |
|--------------------------------|-----------------------------------------------------------------------------------------------------------------------------------------------------------------------------------------------------------------------------------------------------------------------------------------------------------------------------------------------------------------------------------------------------------------------------------------------------------------------------------------------------------------------------------------------------------------------------------------------------------------------------------------------------------------------------------------------------------------------------------------------------------------------------------------------------------------------------------------------------------------------------------------------------------------------------------------------------------------------------------------------------------------------------------------------------------------------------------------------------------------------------------------------------------------------------------------------------------------------------------------------------------------------------------------------------------------------------------------------------------------------------------------------------------------------------------------------------------------------------------------------------------------------------------------------------------------------------------------------------------------------------------------------------------------------------------------------------------------------------------------------------------------------------------------------------------------------------------------------------------------------------------------------------------------------------------------------------------------------------------------------------------------------------------------------------------------------------------------------------------------------------------------------------------------------------------------------------------------------------------------------------------------------------------------------------------------------------------------------------------------------------------------------------------------------------------------------------------------------------------------------------------------------------------------------------------------------------------------------------------------------------------------------------------------------------------------------------------------------------------------------------------------------------------------------------------------------------------------------------------------------------------------------------------------------------------------------------------------------------------------------------------------------------------------------------------------------------------------------------------------------------------------------------------------------------------------------------------------------------------------------------------------------------------------------------------------------------------------------------------------------------------------------------------------------------------------------------------------------------------------------------------------------------------------------------------------------------------|----------------|
| 1,263 human druggable proteins | <p><i>HGNC_SYMBOL, HTR3E, PSMD12, PLK4, PIK3R2, PSMD14, MSTN, PSMA7, XPO1, DCLK1, PLA2G10, PDPK1, CYP26A1, MLNR, MGAM, HCRTR2, CACNA1F, BRD4, NR1I2, GMNN, STK16, TRPA1, DGAT1, PAK3, HTR3B, BMP10, ABCA1, ABHD16A, F8, F9, TNF, IFNA1, IFNG, IGHE, FNI, TTR, CXCL10, CSF2, MASI, CD74, CD3D, SHBG, TRAV29DV5, IGF1, CYP17A1, IL5, SERPINE1, CYP1A2, IL6, LCK, CDK1, CD2, CEACAM5, CALCA, LIPF, TUBB, CHRM4, SERPINA6, MMP2, PTPRC, MYL3, HCK, CYP3A4, CYP21A2, HTR1A, CD3G, ALOX5, WEE2, CD28, RARB, THRA, MYL2, HSPA8, CHRM1, PIMI, TOP1, TOP2A, DMD, CDK4, IMPDH2, FCGR1A, SRC, MYH6, RARG, ADRB3, FOLR2, SI, INSR, PKM, TYR, GABRA1, IFNGR1, FOLR1, CD19, ELN, CYP11B1, PNLIP, ENG, FLT1, ADRA2B, GABRB1, GABRG2, CYP11B2, RXRA, ERBB3, GART, CDH3, CA4, MMP8, PPIB, EDNRB, HRH2, BRD2, PSMA1, PSMA3, HSD3B2, CD27, PIK3R1, PSMB8, PSMB9, PSMB4, PSMB6, RXRB, HSD11B1, CTGF, CD40LG, AVPR2, CALCR, SRD5A2, SSTR3, CNR2, TRHR, PTGS2, OPRM1, SCN4A, PDE6B, IFNGR2, THPO, MPL, ADH7, CASR, GRM5, MC3R, AKR1C3, PIK3CA, CA7, NR4A2, KIR2DL1, KIR2DL2, KIR2DL3, PSMC4, TNNT2, MMP13, NOTCH1, AVPR1B, MTNR1A, CSNK1A1, PIK3CG, MAPKAPK2, PSMB3, CLK1, CLK2, GSK3A, AGTR2, CDK7, IRAK1, PSMD7, CCR4, CCR9, BMX, KIF11, EPHB3, LOXL3, PSMC1, RBX1, TNNC1, TUBA4A, TUBB4B, HBB, HBA1, HBA2, PIP4K2B, HAMP, MUC5AC, CDK6, CDK5, CDK17, NFKB2, SCN7A, FKBP4, KMT2A, RELA, NOTCH2, ACVR1, GRIN1, BTK, LTB, PDE4B, PDE4D, MAP4K2, SLC10A2, GRIN2B, PDE3B, FKBP5, PRPF4B, HTR4, NCOA4, IKBKE, IL13RA2, MELK, NR1I3, EBP, SHH, MYLK, KCNJ8, ADRM1, NFE2L2, RPE65, DDB1, BCL2A1, IL17A, CYP2A13, AOC3, MGAM2, HLA-DRB1, MYLK3, SLC22A6, SLC44A4, TMEM97, TUBA1A, MARK2, SV2A, KCNK18, TPH2, PSMA8, SLC22A8, MAPK15, HDAC2, BCL2L2-PABPN1, GHSR, MAP4K1, APH1A, AURKB, SLC46A1, PVRL4, TAARI, HBEGF, HSD17B10, TSSK1B, HDAC8, FGF23, IL22, HIPK3, CYP3A43, CD248, PDE7B, TNFRSF12A, KCNK9, DLL4, PSENNEN, PIM2, HDAC6, GABBR1, GDF2, CA14, NOTCH3, GABRQ, SRPK3, AKT3, HCN4, ANGPTL3, HRH3, SCN10A, ICOS, TNFSF11, TNFSF14, LTA, CD4, MMP3, IL8, PDGFRA, TNFRSF9, DDR1, GLA, NCAM1, HGF, IL6ST, AKR1C1, MPO, IL12B, IL5RA, PSMB11, MYH7B, PSMD11, BMPR1B, CDC7, PIK3CD, STK25, FAAH, CACNA1A, GABRP, KCNK3, RIOK3, TERT, CHEK1, GABRD, FFAR1, IKBKB, AURKA, GAK, NPC1, ANGPT2, HDAC3, GRIN2D, TLR3, KCNN4, PRPF4, GPR39, PSMD3, MAP3K13, DAPK3, MAP3K7, RIPK2, CACNA1G, KCNQ3, KCNQ2, CA12, HCRTR1, PSCA, PDE6D, AKR1B10, NUAK1, GRIN3B, CCNT1, PDE8A, JAK2, ABCC9, RAMP1, CTSV, FZD7, ROCK2, GUCY1B2, NCOR1, ULK1, CA11, RPS6KA5, RPS6KA4, IDH1, TNFSF13, GABBR2, PDE5A, STK10, PRKD3, KCNK2, S1PR2, CACNA1H, PDE8B, TNKS, ESRRB, MAP4K4, GLP2R, S1PR4, PAK4, CHEK2, ADH1B, ADH1C, ALDH1A1, DHFR, GSR, PAH, SOD1, PNP, ABLI, CFD, F12, PLAT, CA1, CA2, SERPINC1, C5, PDGFB, NGF, IGF2, IL1A, IL1B, TRAC, LMNA, TNNC2, FGB, CHRNA1, AFP, GC, ESRI, KLKB1, TRGV3, HMGCR, RAF1, GBA, APOB, NR3C1, TK1, VWF, TUBB4A, TRBV7-9, ERBB2, NTRK1, TP53, AMY2A, CYP1A1, TYMS, ATP1A1, ATP1B1, APP, ALDH2, ITGB3, ITGB2, CYP11A1, IL4, PRKCG, FGF1, ITGB1, PRKCB, INSR, FYN, BCHE, PGR, EIF4E, NPM1, ITGAV, TH, TPO, KLK3, H1F0, ADH1A, FES, CSF1R, CHRNG, ADRB2, CD3E, HSP90AA1, YES1, LYN, IGF1R, CHRM2, ABCB1, NR3C2, HSP90AB1, ADH4, MME, INHBA, ITGA2B, MET, ADRB1, FCGR3A, ITGA5, VIM, STS, CHRM5, ADRA2A, ROS1, FGF2, HMGB1, TACSTD2, FGR, PARP1, LTA4H, ADORA3, CALM1, TUBA3C, CALCB, GAA, AR, RARA, ARAF, BCL2, TGFB3, CYP2D6, MAPT, KIT, THRB, CD37, UMPS, ITGAM, CHRN1, BCR, FGFR1, VDR, ESRRA, CYP2A6, CYP19A1, CETP, CYP2C9, ADH5, MS4A1, ODC1, ACE, MYL4, MYH7, CCL2, CFTR, ITGA4,</i></p> | PMID: 33837377 |

*ATP1A3, EEF2, SLC5A1, HSD17B1, FDPS, DRD2, IL2RB, BRAF, GLUL, IL9, CSF2RA, PHKG2, MUC1, ALOX15, NPR1, CD44, CTLA4, EPCAM, DPEP1, TSHR, PDE6A, SELE, FER, PRKCA, ITGA2, PRKACA, TYRPI, TPH1, CHRN2, CR1, PSMC3, ALOX12, ITGB5, SRD5A1, PDE6G, ITGB6, ADRA2C, SDC1, EPOR, TNNI3, AOC1, NFKB1, TYMP, CD22, ALOX5AP, CHRM3, PSMB1, ATP4A, ITGAL, DDC, CYP3A5, IMPDH1, MAG, MAOA, TACR2, SIPR1, CNR1, DRD1, C5AR1, TBXA2R, FGFR2, RYR1, DRD4, DRD5, COMT, IL10, ACHE, FGFR4, FGFR3, PRKACG, PRKACB, LHCGR, PTGS1, GLRA1, RPS6KB1, JAK1, TNFSF4, CPT2, RRM1, FSHR, CMA1, SLC6A2, GABRR1, CCND1, CYP3A7, TBXAS1, PRKCH, CCNE1, CDK2, CXCR1, CXCR2, GUCY2C, ADRA1D, EDNRA, TACR1, PTAFR, PSMA2, PSMA4, ITGB7, DNMT1, IL3RA, MAOB, MAPK3, MARK3, DPP4, PDE4A, PSMA5, PSMB5, HTR1D, HTR1B, HTR2A, ADH6, HTR2C, GABRB3, MAPK1, TNFRSF8, IMPA1, ADORA2A, ADORA2B, EPHA2, EPHA3, EPHA8, TACR3, LTK, CASP1, TYK2, CD6, CCND2, CCND3, WEE1, BDKRB2, SLC6A1, CHRNA5, TSPO, ADORA1, AGTR1, OXTR, SSTR1, SSTR2, CHRN4, HTR1F, GNRHR, NTSR1, CPS1, RRM2, CD52, SSTR4, SLC5A2, GABRA5, SLC6A4, AKT1, AKT2, ATIC, CCKAR, CCKBR, MC4R, CCR1, CHRNA3, GRK4, HPD, ICAM3, CD70, MC5R, KIF5B, CYP2C19, GUCY1A2, ABCC1, CD80, TTK, GABRA3, EPHX2, HTR7, PTGER1, CRHR1, IL13, SSTR5, ADRA1A, HRH1, ADRA1B, PTGER4, DRD3, SCN1A, SOAT1, BSG, CHKA, PSMC2, MAP2K2, CHRNA7, FLT3, TGFBRI, SCNN1A, PPARG, FDFT1, AVPR1A, GGCX, GRIK1, PLA2G5, CD79B, PSMB10, IL15, PMEL, OPRD1, OPRK1, OPR1, P2RY2, HNF4A, CSK, IARS, SLC19A1, HTR2B, CCR2, PRKCI, CD86, GRIA1, GRIA2, GRIA3, PIK3CB, MTOR, TEC, TXK, ABL2, FRK, HTT, PTGFR, PTGER3, PTGER2, PTGIR, MCAM, GLP1R, CTSK, GPD2, SYK, TNFRSF4, NAMPT, CHRNA4, TNNT3, MAPK8, MAPK9, RECQL, HTR3A, BDKRB1, GABRA2, GABRB2, GCGR, SCTR, HTR5A, XDH, GRIA4, SLC6A9, GABRA4, RXRG, IFNAR2, PSMD8, CSNK1D, IDH2, SLC9A3, TNNI2, MTNR1B, CDK8, FNTA, FNTB, CSNK1E, PSMB2, PGF, VEGFB, PSEN1, PSEN2, GSK3B, DIO1, NPY4R, HTR6, CDK9, ATP1A2, RAB9A, PDE6C, ATP4B, SCNN1B, SCNN1G, RORC, BLK, CYP2J2, ALDH5A1, CCL11, CCR5, KCNQ1, CLCN2, RPS6KA3, JAK3, PLK1, DAPK1, COL4A4, LIMK2, MAPK12, MAPK10, BLM, CACNA2D1, PRKAA2, ATP1B3, FXD2, EPHA5, EPHB1, EPHA4, SLC12A3, PSMD4, NR1H2, MTPP, CASP9, GFER, P2RX3, HDAC4, KCNQ4, BACE1, CLDN18, SIK1, KCNK10, SHFM1, PSMA6, CXCR4, TGFB2, PSMC5, PSMC6, ESRRG, PPIA, FKBP1A, KCNJ2, FKBP1B, TUBA1B, CSNK2A1, GABRE, SRPK2, PRKDC, ADAM17, IL13RA1, MAP3K9, HSD11B2, ABAT, CDK16, CACNA1B, MDM2, MYL7, PMP22, MYT1, CACNA1D, MC2R, MC1R, SLC6A3, GUCY1A3, DHODH, GUCY1B3, PRKCE, RHD, GHRHR, MAP2K1, MAP3K10, TOP2B, PPAR, PTH1R, FOLH1, PRKCQ, CHRNE, MST1R, PTK2, PRKCZ, PRKCD, CHRN3, SLC18A2, PPAT, AOX1, TYRO3, CHRN, BCL2L1, MCL1, PPARA, TNK2, CYP24A1, PPP3CA, PDE4C, PPID, ITK, DMPK, ABCC8, KCNMA1, KCNH2, MAP3K12, GRIN2A, DPYD, FAP, GRIK2, GRIK3, STK4, PLA2G7, PRKAA1, NR1H3, MAP2K5, PAK2, STK3, PSMD2, MAP3K1, PRKG2, PTGDR, GPR17, MSLN, IKZF1, ROCK1, FZD5, TNK1, MADCAM1, BIRC3, BIRC2, TUBB3, ATR, HDAC1, CAMK2G, CAMK2D, NAE1, CUL4A, SLC12A1, DYRK1A, TPBG, CACNA1S, ACVR2B, ATP1A4, BMPR2, PTK6, TUBB2A, CACNA1C, PDE7A, PDE6H, PRKG1, IL18, KEAP1, PTK2B, FZD2, GRM2, PDE3A, SCN5A, SQLE, KCNJ11, GRM3, GRIN2C, PSMD6, BRD3, PDCD1, PDK1, PDK2, PDK3, PRKD1, ERBB4, RPS6KA2, DHCR24, SF3B3, RYR3, RPS6KA1, TESK1, LTBR, MAPK11, NPY5R, CHRNA2, CHRNA6, STK11, GRK1, SCN9A, GRIK4, CCDC6, GABRA6, GRIK5, PKN1, PKN2, MAPK14, MAP3K11, CALCR, NTRK2, SMN2, PDK4, HIF1A, UGCG, CA9, PHKG1, DDR2, CYP51A1, TXNRD1, AAK1, TUBB8, PDCD4, MAP3K19, BRDT, TNNI3K, LRRK2, ANO1, CD276, TUBA3E, ULK3, NPSR1, HTR3D, TRPM8, DPP9, PIM3, MYLK4, HIPK1, IFNLR1, CAMK1D, MAP4K3, MAPKAPK5, ULK2, GABRG1, CA13, ABHD12, MINK1, DAGLB, HIPK4, TRPV1, TRPV3, UBA3, GRIN3A, STK35, HCAR2, GPBAR1, GRK7, CLEC4C, HDAC7, APH1B, HTR3C, RXFP2, MUC16, PIK3R5, CPT1B, NCSTN, PIK3R3, ESR2, RORB, BCL2L2, SLC02A1, BHMT, TSLP, TOP1MT, HDAC10, HDAC11, LINGO1, SLC47A1, LOXL4, EGLN2, NR1H4, CAMKK2, SLC22A12, SRPK1, CRBN, CSF3R, SCN2A, PSMB7, PSMD1, SIPR3, GPER, P2RX7, PKMYT1, MAP3K5, SIGMARI, PIP5K1A, MAP3K3, GPA33, SLC29A1, EPAS1, TSG101, SMO, GABRG3, SOST, VKORC1, TUBA1C, RIOK1, TUBB6, ABHD6, TUBB2B, RIOK2, EBPL, ACE2, STK33, DCLK3, EGLN1, CHRNA10, NUA2, PARP12, SIK2, MYLK2, SIPR5, P2RY12, SLK, TNKS2, TAOK3, BHMT2, HIPK2, HRH4, SRMS, FZD8, TUBB1, EGLN3, SRD5A3, CLK4, TRPV4, RXFP1, NOD2, EML4, GPR35, PDE11A,*

|                                                                               |                                                                                                                                                                                                                                                                                                                                                                                                                                                                                                                                                                                                                                                                                                                                                                                                                                                                                                                                                                                                                                                                                                                                                                                                                                                                                                                                                                                                                                                                                                                                                                                                                                                                                                                                                                                                                                                                                                                                                                                                                                                                                                                                                                                                                                                                                                                                                                                                                                                                                                                                                                                                                                                                                                                                                                                                                                                                                                                                                                                                                                                                                                                                                                                                                                                     |                       |
|-------------------------------------------------------------------------------|-----------------------------------------------------------------------------------------------------------------------------------------------------------------------------------------------------------------------------------------------------------------------------------------------------------------------------------------------------------------------------------------------------------------------------------------------------------------------------------------------------------------------------------------------------------------------------------------------------------------------------------------------------------------------------------------------------------------------------------------------------------------------------------------------------------------------------------------------------------------------------------------------------------------------------------------------------------------------------------------------------------------------------------------------------------------------------------------------------------------------------------------------------------------------------------------------------------------------------------------------------------------------------------------------------------------------------------------------------------------------------------------------------------------------------------------------------------------------------------------------------------------------------------------------------------------------------------------------------------------------------------------------------------------------------------------------------------------------------------------------------------------------------------------------------------------------------------------------------------------------------------------------------------------------------------------------------------------------------------------------------------------------------------------------------------------------------------------------------------------------------------------------------------------------------------------------------------------------------------------------------------------------------------------------------------------------------------------------------------------------------------------------------------------------------------------------------------------------------------------------------------------------------------------------------------------------------------------------------------------------------------------------------------------------------------------------------------------------------------------------------------------------------------------------------------------------------------------------------------------------------------------------------------------------------------------------------------------------------------------------------------------------------------------------------------------------------------------------------------------------------------------------------------------------------------------------------------------------------------------------------|-----------------------|
|                                                                               | <p><i>BCL2L10, IL23A, RTN4, KCNQ5, TLR9, CYSLTR2, SLC22A11, BMP2K, TDPI, IRAK4, SIRT5, P4HTM, SCN3A, CACNA2D2, SLC5A4, TLR7, MAP3K20, IL20, CISD1, CACNA1I, STK26, RCOR3, EIF2AK4, DHCR7, RPS6KB2, MALT1, STK17A, EPHA6, CHRNA9, PARP2, NPC1L1, TBK1, STEAP1, EGFL7, SCN11A, DAPK2, TNIK, UTS2R, IKZF3, HDAC9, ALK, CELA1, PSMD13, FZD1, TFR2, AURKC, SCN8A, HDAC5, CAMK2A, PDE10A, HPSE, CYSLTR1, CA5B, NISCH, SIK3, MAP3K2, DYRK1B, L3MBTL1, DAGLA, LOXL2, MAP4K5, TNFRSF18, PTGDR2, IRAK3, NCOR2, STK24, PARP3, DNMT3A, MAP3K4, TNFRSF10A, TNFRSF10B, EGFR, REN, ADA, TGFB1, IL2RA, TFRC, MMP1, CD5, MMP7, CSF1, SPP1, IL1R1, TNFRSF1A, IL4R, F2R, CD40, CD38, AXL, CA5A, LTBR, ACVRL1, CD200, SULT1A1, EPHB4, IL10RB, MERTK, CASP8, ANGPT1, NTRK3, PCSK9, CD274, TNFSF13B, F2, PLG, CD14, TLR4, NRP1, MAPK13, ICOSLG, DKK1, ICAM1, FCER2, CA3, RET, GSTP1, PDGFRB, GHR, PTHLH, TDGF1, SELL, ATP1B2, PLA2G2A, MMP9, IDO1, AKR1B1, NQO1, NQO2, CBRI, IFNARI, CD33, EPHA1, CA6, TNC, EPHB2, CSF2RB, TIE1, FLT4, KDR, SNCA, PTGDS, PRCP, LEPR, VEGFA, IL11RA, GPNMB, RRM2B, LY96, EPHB6, TNFSF12, VEGFA, SELP, MMP12, GFRA1, DLK1, TEK, PDCD1LG2, SLAMF7, F10, MFGE8, IL6R, IL17RA,</i></p>                                                                                                                                                                                                                                                                                                                                                                                                                                                                                                                                                                                                                                                                                                                                                                                                                                                                                                                                                                                                                                                                                                                                                                                                                                                                                                                                                                                                                                                                                                                                                                                                                                                                                                                                                                                                                                                                                                                                                                                                                                                         |                       |
| <p>703 human druggable proteins have evidence for involvement in COVID-19</p> | <p><i>SIGMAR1, DNMT1, SIRT5, BRD4, BRD2, IL17RA, TLR9, TLR7, ESR1, ESR2, CSNK2A1, RET, FLT3, PIK3CD, TOP2A, PIK3R1, AXL, PIK3CB, PIK3CG, EBP, ALK, PIK3R2, CCNT1, CDK1, ROS1, CDK4, CCND1, CCNE1, CDK2, CCND3, PIK3CA, CDK9, CDK6, CDK5, DHCR24, MAPK14, PIK3R5, PIK3R3, ABL1, LMNA, LYN, CHRM4, CHRM5, ADRA2A, PDGFRB, KIT, BCR, FGFR1, DRD2, PDGFRA, FLT1, ADRA2C, CHRM3, IMPDH1, FGFR2, FGFR4, FGFR3, ADRA1D, HTR2A, HTR2C, HRH1, DRD3, KDR, HTR2B, ABL2, HTR6, SMN1, SMN2, PLK4, GAK, NPC1, JAK2, CACNA1F, ROCK2, EGFR, F10, CA1, CA2, NR3C1, ERBB2, TP53, INSR, LCK, FYN, PGR, EIF4E, CSF1R, YES1, IGF1R, ABCB1, HCK, CYP3A4, FGR, RARA, RARB, CHRM1, VDR, CYP2C9, RARG, NQO2, ADRA2B, ATP4A, DRD1, DRD4, PPIB, SLC6A2, AGTR1, SLC6A4, CYP2C19, HTR7, PTGS2, OPRM1, FLT4, THPO, CSK, MTOR, TEC, TXK, PTGIR, RAB9A, BLK, BMX, JAK3, BLM, ESRRG, PPIA, FKBP1A, FKBP1B, CACNA1D, FKBP4, GRIN1, BTK, PPP3CA, DDR1, PPID, KCNH2, STK4, MAP2K5, STK3, GRIN2B, FKBP5, ROCK1, PRPF4B, CAMK2D, CACNA1S, PTK6, CACNA1C, ERBB4, CA9, DDR2, AAK1, PDCD4, MAP3K19, SLC47A1, SRPK1, EBPL, NUAK2, CLK4, TDP1, DHCR7, SRPK3, CAMK2A, RIPK2, IMPDH2, SRC, BMPR1B, AURKA, EPHB6, MAPK13, PRPF4, NUAK1, PAK4, ALDH1A1, RAF1, ATP1A1, ATP1B1, CYP17A1, PRKCB, CHRM2, MET, ARAF, CYP2D6, THRB, PIM1, CYP19A1, CFTR, ATP1A3, ATP1B2, BRAF, CYP11B2, EPHA1, ERBB3, DRD5, CPT2, MAPK3, MARK3, MAPK1, EPHA2, EPHA3, EPHA8, EPHB2, CCND2, AKT1, AKT2, EPHX2, PTGER1, SCN1A, SCN4A, TIE1, MPL, GRIA1, GRIA2, GRIA3, FRK, PTGER2, SYK, MAPK8, MAPK9, GRIA4, MAPKAPK2, CDK8, FNTA, FNTB, CDK7, ATP1A2, PLK1, LIMK2, MAPK12, MAPK10, ATP1B3, FXD2, EPHB3, EPHA5, EPHB4, EPHB1, EPHA4, SIK1, KCNJ2, MAP3K9, SCN7A, MYT1, TEK, ACVR1, TNK2, CYP24A1, PRKG2, TNK1, NAE1, DYRK1A, ATP1A4, SCN5A, TESK1, MAPK11, GRK1, SCN9A, PKN1, PKN2, MAP3K11, CYP51A1, TNNS3K, MARK2, PIM3, HIPK4, UBA3, MAPK15, GRK7, CPT1B, AURKB, CAMKK2, SCN2A, PKMYT1, RIOK2, TSSK1B, SIK2, SRMS, EML4, SCN3A, MAP3K20, PIM2, EIF2AK4, TBK1, SCN11A, SCN8A, PDE10A, AKT3, SIK3, HCN4, DYRK1B, MAP4K5, SCN10A, RBX1, IKZF1, CUL4A, DDB1, CRBN, IKZF3, KCNK3, RIOK3, XPO1, DCLK1, GRIN2D, TLR3, DAPK3, MAP3K7, CA12, PDE6D, GRIN3B, GUCY1B2, GMNN, STK16, PDE5A, STK10, KCNK2, S1PR2, ESRRB, S1PR4, DHFR, F2, PLG, REN, SERPINC1, C5, TNF, IFNG, IL1B, KLKB1, MMP1, HMGCR, CSF2, MASI, SHBG, TUBB4A, NTRK1, TYMS, ITGB3, CYP1A2, IL6, TUBB, ADRB2, SERPINA6, NR3C2, ITGA2B, CD14, ADRB1, IL6R, MMP7, HMGB1, LTA4H, ADORA3, TUBA3C, CXCL8, AR, ESRRB, ACE, SLC5A1, ADRB3, INSRR, IL1R1, CSF2RA, VEGFA, ALOX15, SELP, TSHR, PDE6A, FER, IFNARI, SRD5A1, PDE6G, NFKB1, CYP3A5, S1PR1, CNR1, GART, ACHE, MMP8, PTGS1, CA6, GLRA1, JAK1, CYP3A7, EDNRB, TBXAS1, HRH2, EDNRA, TACR1, DPP4, HTR1D, ADORA2A, ADORA2B, CCN2, TYK2, CD6, AVPR2, OXTR, GNRHR, SRD5A2, SLC5A2, ATIC, GRK4, CSF2RB, CD80, TTK, ADRA1A, ADRA1B, PDE6B, MAP2K2, AVPR1A, OPRD1, OPRK1, SLC19A1, CD86, AKR1C3, CA7, MMP13, AVPR1B, MTNR1A, IFNAR2, MTNR1B, CLK1, GSK3B, AGTR2, PDE6C, CYP2J2, CCR5, RPS6KA3, DAPK1, PRKAA2, KCNK10, TUBA1B, TUBA4A, TUBB4B, PIP4K2B, SRPK2, CDK16, CDK17, SLC6A3, DHODH, GUCY1B1, MAP2K1, TOP2B, AOX1, IL10RB, ITK, MERTK, GRIN2A, FAP, PRKAA1, TUBB3, CAMK2G, BMPR2, TUBB2A, PDE6H, PRKG1, PTK2B,</i></p> | <p>PMID: 33837377</p> |

|  |                                                                                                                                                                                                                                                                                                                                                                                                                                                                                                                                                                                                                                                                                                                                                                                                                                                                                                                                                                                                                                                                                                                                                                                                                                                                                                                                                                                                                                                                                                                                                                                                                                                                                                                                                                                                                                        |  |
|--|----------------------------------------------------------------------------------------------------------------------------------------------------------------------------------------------------------------------------------------------------------------------------------------------------------------------------------------------------------------------------------------------------------------------------------------------------------------------------------------------------------------------------------------------------------------------------------------------------------------------------------------------------------------------------------------------------------------------------------------------------------------------------------------------------------------------------------------------------------------------------------------------------------------------------------------------------------------------------------------------------------------------------------------------------------------------------------------------------------------------------------------------------------------------------------------------------------------------------------------------------------------------------------------------------------------------------------------------------------------------------------------------------------------------------------------------------------------------------------------------------------------------------------------------------------------------------------------------------------------------------------------------------------------------------------------------------------------------------------------------------------------------------------------------------------------------------------------|--|
|  | <p><i>MELK, GRIN2C, PDCD1, RPS6KA2, SF3B3, STK11, NTRK3, IL17A, NTRK2, HIF1A, TUBB8, LRRK2, TUBA3E, AC091230.1, NPSR1, TUBA1A, KCNK18, IFNLRI, MINK1, GRIN3A, MAP4K1, S1PR3, GPER1, HSD17B10, PIP5K1A, MAP3K3, SLC29A1, TUBA1C, RIOK1, TUBB6, TUBB2B, DCLK3, S1PR5, P2RY12, SLK, TUBB1, SRD5A3, CYP3A43, KCNK9, CYSLTR2, BMP2K, SLC5A4, STK26, DAPK2, TNK1, CYSLTR1, MAP3K2, PTGDR2, GLA, COMT, BRD3, F8, IL2RA, FGB, VWF, CD2, CD3E, ALOX5, MS4A1, ITGA4, PKM, IL2RB, GLUL, IFNGR1, NQO1, ALOX12, ITGAL, CXCR1, CXCR2, F2R, ITGB7, HSD3B2, PDE4A, IL12B, CD52, PPARG, IFNGR2, CCR2, RECQL, CXCR4, ADAM17, PPAT, PDE4B, PDE4C, AC008397.2, PDE4D, PTGDR, GPR17, KEAP1, PDE3A, IL11RA, TXNRD1, CA13, CSF3R, VKORC1, HRH4, NOD2, GPR35, IL23A, TNFSF13B, CA5B, HRH3, ACE2, TLR4, PSMD11, CDC7, PSMD14, STK25, TNFRSF10B, PSMA7, PDE8A, CTSV, NCOR1, ULK1, IDH1, TNFSF13, CHEK2, PLAT, ADA, IL1A, TTR, AFP, CXCL10, TFRC, APOB, TK1, CD74, APP, ALDH2, IL4, MPO, ITGB1, CEACAM5, NPM1, ITGAV, HI-0, HSP90AA1, HSP90AB1, ITGA5, VIM, GSTP1, CSF1, PARP1, CALM1, BCL2, SPP1, HSPA8, TOP1, ADH5, CCL2, EEF2, PLA2G2A, AKR1B1, FOLR1, CD19, PHKG2, MUC1, CD44, EPCAM, PRKCA, PRKACA, TNNI3, DDC, IL10, PRKACG, PRKACB, RPS6KB1, RRM1, PSMA2, PSMA3, PSMA4, PSMB9, PSMA5, PSMB5, BDKRB2, CPS1, RRM2, KIF5B, GUCY1A2, ABCC1, SOAT1, BSG, PSMC2, SNCA, GGCX, IL6ST, HTT, GLP1R, GPD2, PSMC4, BDKRB1, PSMD8, IDH2, PSMB3, PSEN1, GSK3A, PSMD7, KIF11, NR1H2, GFER, HDAC4, PSMA6, PSMC1, PSMC5, HBA2, HBA1, PRKDC, NFKB2, KMT2A, PTK2, PRKCZ, PRKCD, BCL2L1, MCL1, MFG8, PAK2, PSMD2, MAP3K1, HDAC1, IL18, PSMD6, PDK1, RPS6KA1, SHH, MYLK, ADRM1, CCDC6, BCL2A1, TMEM97, RRM2B, DPP9, MAPKAPK5, ABHD12, PCSK9, TRPV1, HDAC7, MUC16, HDAC2, BCL2L2, BCL2L2-PABPN1, PSMD1, GPA33, TSG101, IL22, RTN4, RPS6KB2, STK17A, PSMD13, NCOR2, STK24</i></p> |  |
|--|----------------------------------------------------------------------------------------------------------------------------------------------------------------------------------------------------------------------------------------------------------------------------------------------------------------------------------------------------------------------------------------------------------------------------------------------------------------------------------------------------------------------------------------------------------------------------------------------------------------------------------------------------------------------------------------------------------------------------------------------------------------------------------------------------------------------------------------------------------------------------------------------------------------------------------------------------------------------------------------------------------------------------------------------------------------------------------------------------------------------------------------------------------------------------------------------------------------------------------------------------------------------------------------------------------------------------------------------------------------------------------------------------------------------------------------------------------------------------------------------------------------------------------------------------------------------------------------------------------------------------------------------------------------------------------------------------------------------------------------------------------------------------------------------------------------------------------------|--|

439

440

441

**Supplemental Table S14. Functional enrichment analysis of 190 up-DEGs associated with severe COVID-19 based on the Reactome database**

| Description                                             | Size | Ratio | P Value  | FDR      |
|---------------------------------------------------------|------|-------|----------|----------|
| Immune System                                           | 1997 | 2.56  | 1.65E-14 | 2.86E-11 |
| Innate Immune System                                    | 1053 | 3.24  | 1.79E-12 | 1.55E-09 |
| Neutrophil degranulation                                | 479  | 4.07  | 3.39E-09 | 1.95E-06 |
| Negative regulators of DDX58/IFIH1 signaling            | 34   | 16.71 | 1.49E-07 | 6.45E-05 |
| Cellular responses to external stimuli                  | 503  | 3.23  | 3.15E-06 | 1.09E-03 |
| DDX58/IFIH1-mediated induction of interferon-alpha/beta | 78   | 8.33  | 4.86E-06 | 1.40E-03 |
| Interleukin-4 and Interleukin-13 signaling              | 108  | 6.77  | 6.92E-06 | 1.71E-03 |
| Adaptive Immune System                                  | 756  | 2.58  | 1.45E-05 | 3.13E-03 |
| Interferon alpha/beta signaling                         | 69   | 8.24  | 2.09E-05 | 4.02E-03 |
| Cellular responses to stress                            | 426  | 3.05  | 6.63E-05 | 1.15E-02 |
| Regulation of TLR by endogenous ligand                  | 19   | 17.09 | 7.38E-05 | 1.16E-02 |
| Cytokine Signaling in Immune system                     | 688  | 2.48  | 9.46E-05 | 1.36E-02 |
| Interferon gamma signaling                              | 92   | 6.18  | 1.34E-04 | 1.79E-02 |

|                                                        |     |       |          |          |
|--------------------------------------------------------|-----|-------|----------|----------|
| Interferon Signaling                                   | 197 | 4.12  | 1.56E-04 | 1.93E-02 |
| Class I MHC mediated antigen processing & presentation | 371 | 3.06  | 1.86E-04 | 2.14E-02 |
| Antigen processing-Cross presentation                  | 99  | 5.74  | 2.13E-04 | 2.30E-02 |
| IRF3-mediated induction of type I IFN                  | 13  | 18.74 | 4.77E-04 | 4.85E-02 |

442

443

444

**Supplemental Table S15. Disease-based enrichment analysis of 190 up-DEGs associated with severe COVID-19 among *CCR1*+ *CD16*+monocytes based on the GLAD4U database.**

| Disease terms                 | Size | Expect | Enrichment Ratio | P Value  | FDR      |
|-------------------------------|------|--------|------------------|----------|----------|
| Infection                     | 643  | 5.19   | 5.40             | 2.90E-13 | 7.88E-10 |
| Virus Diseases                | 580  | 4.68   | 5.56             | 1.17E-12 | 1.59E-09 |
| Inflammation                  | 565  | 4.56   | 5.48             | 4.42E-12 | 4.01E-09 |
| Hepatitis                     | 253  | 2.04   | 7.84             | 2.45E-10 | 1.67E-07 |
| Immune System Diseases        | 806  | 6.50   | 3.84             | 7.35E-09 | 4.00E-06 |
| Necrosis                      | 371  | 2.99   | 5.35             | 5.79E-08 | 2.62E-05 |
| Hyperoxia                     | 33   | 0.27   | 22.54            | 2.32E-07 | 9.03E-05 |
| HIV                           | 862  | 6.95   | 3.31             | 4.60E-07 | 1.37E-04 |
| Respiratory Tract Infections  | 281  | 2.27   | 5.73             | 4.85E-07 | 1.37E-04 |
| virological response          | 282  | 2.28   | 5.71             | 5.05E-07 | 1.37E-04 |
| Sexually Transmitted Diseases | 496  | 4.00   | 4.25             | 5.76E-07 | 1.42E-04 |
| Encephalitis, Viral           | 66   | 0.53   | 13.15            | 1.02E-06 | 2.31E-04 |
| Bacterial Infections          | 260  | 2.10   | 5.72             | 1.39E-06 | 2.91E-04 |
| Retroviridae Infections       | 494  | 3.99   | 4.01             | 2.62E-06 | 4.87E-04 |
| HIV Infections                | 495  | 3.99   | 4.01             | 2.69E-06 | 4.87E-04 |
| Lentivirus Infections         | 498  | 4.02   | 3.98             | 2.90E-06 | 4.93E-04 |
| Hepatitis B                   | 190  | 1.53   | 6.52             | 3.39E-06 | 5.42E-04 |
| Mouth Diseases                | 246  | 1.98   | 5.54             | 5.25E-06 | 7.93E-04 |
| Reperfusion Injury            | 86   | 0.69   | 10.09            | 6.15E-06 | 8.80E-04 |
| Encephalitis                  | 89   | 0.72   | 9.75             | 7.73E-06 | 1.05E-03 |
| West Nile Fever               | 35   | 0.28   | 17.71            | 8.58E-06 | 1.11E-03 |

|                                        |     |      |       |          |          |
|----------------------------------------|-----|------|-------|----------|----------|
| Immunologic Deficiency Syndromes       | 500 | 4.03 | 3.72  | 1.36E-05 | 1.66E-03 |
| Rhinitis                               | 135 | 1.09 | 7.35  | 1.40E-05 | 1.66E-03 |
| Tumor Virus Infections                 | 186 | 1.50 | 6.00  | 2.07E-05 | 2.35E-03 |
| Psoriasis                              | 243 | 1.96 | 5.10  | 2.90E-05 | 3.16E-03 |
| Autoimmune Diseases                    | 546 | 4.40 | 3.41  | 3.76E-05 | 3.93E-03 |
| Arthritis, Reactive                    | 78  | 0.63 | 9.54  | 4.00E-05 | 3.99E-03 |
| Skin and Connective Tissue Diseases    | 617 | 4.98 | 3.21  | 4.11E-05 | 3.99E-03 |
| Skin Diseases, Viral                   | 85  | 0.69 | 8.75  | 6.50E-05 | 6.07E-03 |
| Stress                                 | 643 | 5.19 | 3.08  | 6.70E-05 | 6.07E-03 |
| Connective Tissue Diseases             | 392 | 3.16 | 3.79  | 8.40E-05 | 7.32E-03 |
| Hepatitis, Chronic                     | 174 | 1.40 | 5.70  | 8.61E-05 | 7.32E-03 |
| Liver Neoplasms                        | 396 | 3.19 | 3.76  | 9.25E-05 | 7.61E-03 |
| Periodontitis                          | 91  | 0.73 | 8.17  | 9.52E-05 | 7.61E-03 |
| Respiratory Syncytial Virus Infections | 229 | 1.85 | 4.87  | 1.04E-04 | 8.09E-03 |
| Gram-Positive Bacterial Infections     | 181 | 1.46 | 5.48  | 1.13E-04 | 8.56E-03 |
| Periodontal Diseases                   | 96  | 0.77 | 7.75  | 1.28E-04 | 9.41E-03 |
| Dermatitis, Atopic                     | 140 | 1.13 | 6.20  | 1.43E-04 | 1.02E-02 |
| Dermatomyositis                        | 34  | 0.27 | 14.58 | 1.57E-04 | 1.09E-02 |
| Hepatitis C                            | 195 | 1.57 | 5.09  | 1.89E-04 | 1.27E-02 |
| Lipidoses                              | 67  | 0.54 | 9.25  | 2.07E-04 | 1.31E-02 |
| Pneumonia                              | 109 | 0.88 | 6.82  | 2.57E-04 | 1.45E-02 |
| Adenocarcinoma                         | 522 | 4.21 | 3.09  | 3.27E-04 | 1.81E-02 |
| Chondrodysplasia Punctata              | 83  | 0.67 | 7.47  | 5.62E-04 | 2.88E-02 |
| Lupus erythematosus                    | 294 | 2.37 | 3.79  | 6.56E-04 | 3.08E-02 |
| Leukemia                               | 565 | 4.56 | 2.85  | 6.87E-04 | 3.11E-02 |
| Pharyngeal Neoplasms                   | 137 | 1.11 | 5.43  | 8.66E-04 | 3.62E-02 |



|                            |     |      |       |          |          |
|----------------------------|-----|------|-------|----------|----------|
| Frostbite                  | 6   | 0.05 | 41.32 | 9.50E-04 | 3.64E-02 |
| Actinomycetales Infections | 145 | 1.17 | 5.13  | 1.16E-03 | 4.00E-02 |
| Measles                    | 62  | 0.50 | 8.00  | 1.58E-03 | 4.73E-02 |

445

446

447

**Supplemental Table S16. 190 up-DEGs associated with severe COVID-19 among *CCR1+* *CD16+* monocytes matched in druggable gene categories based on the DGIdb resource**

| <b>Druggable Gene Category</b> | <b>Matching Gene Count</b> | <b>Matching Gene(s)</b>                                                                                                                                                                                                                                                                                                                                                                                                                                                          |
|--------------------------------|----------------------------|----------------------------------------------------------------------------------------------------------------------------------------------------------------------------------------------------------------------------------------------------------------------------------------------------------------------------------------------------------------------------------------------------------------------------------------------------------------------------------|
| Druggable genome               | 65                         | <i>AHR, APOBEC3A, ASGR1, C1QB, CD14, CD163, CD300E, CD36, CD53, CD63, CD84, CD99, CDKN1A, CTSA, CTSD, CTSL, CXCL8, CYP1B1, FKBP5, FOLR3, FPR1, FPR2, GLUL, HBEGF, HIF1A, HRH2, HSPA5, ICAM1, IFITM1, IGFBP7, IL4R, ISG15, LAIR1, LDHA, LGALS3BP, MGST1, NAMPT, PARP9, PGD, PIM1, PIM3, PLBD1, PLSCR1, PPIF, PSMA1, P XK, RNASE2, S100A12, S100A8, S100A9, SELL, SERPING1, SGK1, SIGLEC1, SLC12A7, SLC25A37, SLC2A3, SMPDL3A, TCN2, TNFAIP2, TNFSF10, TXN, TXNRD2, UPPI, VCAN</i> |
| Enzyme                         | 35                         | <i>AHR, APOBEC3A, ATG12, BLVRB, CTSA, CTSD, CTSL, CYP1B1, DYNLL1, GLRX, GLUL, GM2A, HIF1A, HSPA5, IFIH1, ISG15, KRTCAP2, NCF1, PARP9, PGD, PIM1, PIM3, P XK, S100A8, S100A9, SGK1, SMPDL3A, SUMO3, SUPT5H, TNFAIP3, UBE2B, UBE2K, UBE2L3, UBE2V2, UPPI</i>                                                                                                                                                                                                                       |
| Kinase                         | 21                         | <i>CCNLI, CD163, CD300E, CD63, CDKN1A, GADD45GIP1, HRH2, IFIH1, IRF3, MPLKIP, PIM1, PIM3, P XK, RGCC, S100A12, S100A8, S100A9, SGK1, SOCS3, STING1, TNFAIP3</i>                                                                                                                                                                                                                                                                                                                  |

|                                  |    |                                                                                                                                     |
|----------------------------------|----|-------------------------------------------------------------------------------------------------------------------------------------|
| Clinically actionable            | 18 | <i>BCL3, CAMTA1, CD36, CDKN1A, CYP11B1, ETV6, HIF1A, H2BC12, IRF2, MAML2, NOP10, PER1, PIM1, PRCC, SGK1, SOCS3, STING1, TNFAIP3</i> |
| Transcription factor             | 14 | <i>AHR, ATF3, CAMTA1, CEBPB, CEBPD, ETV6, HIF1A, ID1, IFI16, IRF2, IRF3, PER1, SCAND1, SGK1</i>                                     |
| Cell surface                     | 8  | <i>C1QB, CD36, CD53, CD63, HBEGF, HSPA5, ICAM1, VAMP5</i>                                                                           |
| Transporter                      | 8  | <i>CD36, EMB, HIF1A, HSPA5, SGK1, SLC12A7, SLC25A37, SLC2A3</i>                                                                     |
| Transcription factor binding     | 7  | <i>AHR, BCL3, HIF1A, ID1, IFI16, PIM1, STING1</i>                                                                                   |
| Drug resistance                  | 6  | <i>CDKN1A, ICAM1, LDHA, MGST1, SGK1, UBE2B</i>                                                                                      |
| External side of plasma membrane | 6  | <i>CD14, CD163, CD36, FLOT1, ICAM1, SLC12A7</i>                                                                                     |
| Protease                         | 5  | <i>CTSA, CTSD, CTSL, PSMA1, TNFAIP3</i>                                                                                             |
| Protease inhibitor               | 4  | <i>APLP2, HSPA5, NAIP, SERPING1</i>                                                                                                 |
| Serine threonine kinase          | 4  | <i>PIM1, PIM3, PXX, SGK1</i>                                                                                                        |
| G protein coupled receptor       | 3  | <i>FPRI, FPR2, HRH2</i>                                                                                                             |
| Nuclear hormone receptor         | 3  | <i>AHR, GADD45GIP1, PER1</i>                                                                                                        |

**Supplemental Table S17. Highly-expressed inflammatory and cytokine genes among ABO+ megakaryocytes**

| Gene name      | T score | Fold change | P value  | FDR       |
|----------------|---------|-------------|----------|-----------|
| <i>ADORA2B</i> | 2.80    | 2.27        | 5.29E-03 | 2.227E-02 |
| <i>ADRM1</i>   | 3.02    | 1.66        | 2.72E-03 | 1.301E-02 |
| <i>AHR</i>     | 2.52    | 2.25        | 1.22E-02 | 4.349E-02 |
| <i>GNA15</i>   | 3.49    | 1.82        | 5.35E-04 | 3.461E-03 |
| <i>IRAK2</i>   | 3.20    | 2.85        | 1.48E-03 | 7.919E-03 |
| <i>KCNA3</i>   | 3.29    | 1.89        | 1.10E-03 | 6.179E-03 |

|               |      |      |          |           |
|---------------|------|------|----------|-----------|
| <i>PDGFA</i>  | 4.26 | 1.71 | 2.53E-05 | 2.666E-04 |
| <i>PTGIR</i>  | 4.05 | 1.56 | 6.18E-05 | 5.671E-04 |
| <i>SPHK1</i>  | 3.71 | 1.57 | 2.36E-04 | 1.745E-03 |
| <i>BMP6</i>   | 2.90 | 2.44 | 3.96E-03 | 1.766E-02 |
| <i>TNFSF4</i> | 4.81 | 2.67 | 2.18E-06 | 3.138E-05 |

451  
452  
453

**Supplemental Table S18. Pathway enrichment analysis of 424 highly-expressed genes among *ABO*+ megakaryocytes.**

| Pathway name                              | Gene size | Enrichment ratio | P Value  | FDR      |
|-------------------------------------------|-----------|------------------|----------|----------|
| Systemic lupus erythematosus              | 133       | 4.79             | 4.55E-07 | 1.48E-04 |
| Alcoholism                                | 180       | 4.01             | 9.82E-07 | 1.60E-04 |
| Platelet activation                       | 123       | 3.80             | 1.42E-04 | 1.55E-02 |
| SNARE interactions in vesicular transport | 34        | 6.24             | 1.10E-03 | 8.94E-02 |
| Endocytosis                               | 244       | 2.43             | 1.80E-03 | 1.17E-01 |
| Viral carcinogenesis                      | 201       | 2.53             | 2.74E-03 | 1.28E-01 |
| VEGF signaling pathway                    | 59        | 4.32             | 2.52E-03 | 1.28E-01 |
| Necroptosis                               | 162       | 2.62             | 4.83E-03 | 1.61E-01 |
| Mitophagy                                 | 65        | 3.92             | 4.11E-03 | 1.61E-01 |
| Chemokine signaling pathway               | 189       | 2.47             | 4.95E-03 | 1.61E-01 |
| Transcriptional misregulation in cancer   | 186       | 2.28             | 1.23E-02 | 3.65E-01 |
| Axon guidance                             | 175       | 2.18             | 2.23E-02 | 6.05E-01 |
| Bacterial invasion of epithelial cells    | 74        | 2.87             | 2.99E-02 | 6.51E-01 |
| Regulation of actin cytoskeleton          | 213       | 1.99             | 2.88E-02 | 6.51E-01 |
| Adherens junction                         | 72        | 2.95             | 2.70E-02 | 6.51E-01 |
| Human cytomegalovirus infection           | 225       | 1.89             | 3.97E-02 | 8.08E-01 |
| Proteoglycans in cancer                   | 201       | 1.90             | 4.77E-02 | 8.64E-01 |
| Tight junction                            | 170       | 2.00             | 4.73E-02 | 8.64E-01 |

454  
455  
456

**Supplemental Table S19. Disease-term enrichment analysis of 35 up-DEGs associated with severe COVID-19 among *ABO*+ megakaryocytes based on the GLAD4U database**

| Term ID  | Disease-terms            | Size | Expect | Enrichment Ratio | P Value  |
|----------|--------------------------|------|--------|------------------|----------|
| PA443490 | Bernard-Soulier Syndrome | 9    | 0.01   | 140.31           | 8.69E-05 |

|             |                                                               |     |      |       |          |
|-------------|---------------------------------------------------------------|-----|------|-------|----------|
| PA445644    | Shock                                                         | 367 | 0.58 | 8.60  | 2.59E-04 |
| PA443842    | Death                                                         | 417 | 0.66 | 7.57  | 4.65E-04 |
| PA445846    | Thrombocytopenia                                              | 96  | 0.15 | 19.73 | 4.67E-04 |
| PA443382    | Anoxia                                                        | 251 | 0.40 | 10.06 | 6.36E-04 |
| PA445457    | Pterygium                                                     | 25  | 0.04 | 50.51 | 7.13E-04 |
| PA165108957 | Venous ulcer of leg                                           | 26  | 0.04 | 48.57 | 7.71E-04 |
| PA166048906 | Blood Platelet Disorders                                      | 118 | 0.19 | 16.05 | 8.51E-04 |
| PA444668    | Keratitis                                                     | 31  | 0.05 | 40.74 | 1.10E-03 |
| PA166129556 | disease activity score 28<br>joint in rheumatoid<br>arthritis | 31  | 0.05 | 40.74 | 1.10E-03 |
| PA443429    | Arteritis                                                     | 34  | 0.05 | 37.14 | 1.32E-03 |
| PA443882    | Dermatomyositis                                               | 34  | 0.05 | 37.14 | 1.32E-03 |
| PA445850    | Thrombosis                                                    | 141 | 0.22 | 13.43 | 1.42E-03 |
| PA166123766 | platelet aggregation                                          | 153 | 0.24 | 12.38 | 1.80E-03 |
| PA446220    | Abdominal Pain                                                | 43  | 0.07 | 29.37 | 2.11E-03 |
| PA445793    | Synovitis                                                     | 47  | 0.07 | 26.87 | 2.51E-03 |
| PA443433    | Arthritis, Juvenile<br>Rheumatoid                             | 48  | 0.08 | 26.31 | 2.62E-03 |
| PA445051    | Necrosis                                                      | 371 | 0.59 | 6.81  | 2.68E-03 |
| PA446477    | Polymyositis                                                  | 49  | 0.08 | 25.77 | 2.73E-03 |
| PA166048887 | Irritable Bowel Syndrome                                      | 50  | 0.08 | 25.26 | 2.84E-03 |
| PA445752    | Stress                                                        | 643 | 1.02 | 4.91  | 3.17E-03 |
| PA445593    | Sarcoidosis                                                   | 56  | 0.09 | 22.55 | 3.55E-03 |
| PA444034    | Endocarditis                                                  | 67  | 0.11 | 18.85 | 5.04E-03 |
| PA443829    | Cystic Fibrosis                                               | 223 | 0.35 | 8.49  | 5.20E-03 |
| PA445044    | Nasal Polyps                                                  | 75  | 0.12 | 16.84 | 6.27E-03 |
| PA444035    | Endocarditis, Bacterial                                       | 76  | 0.12 | 16.62 | 6.44E-03 |
| PA445512    | Arthritis, Reactive                                           | 78  | 0.12 | 16.19 | 6.77E-03 |
| PA446020    | Varicose Veins                                                | 79  | 0.13 | 15.99 | 6.94E-03 |

|             |                                     |     |      |        |          |
|-------------|-------------------------------------|-----|------|--------|----------|
| PA165108622 | Drug interaction with drug          | 494 | 0.78 | 5.11   | 7.38E-03 |
| PA165374639 | suicide                             | 83  | 0.13 | 15.22  | 7.63E-03 |
| PA446303    | Tooth Loss                          | 84  | 0.13 | 15.03  | 7.81E-03 |
| PA444942    | Methemoglobinemia                   | 5   | 0.01 | 126.28 | 7.89E-03 |
| PA447296    | nondiabetic proteinuric nephropathy | 5   | 0.01 | 126.28 | 7.89E-03 |
| PA443474    | Bacterial Infections                | 260 | 0.41 | 7.29   | 7.93E-03 |
| PA445672    | Sinusitis                           | 89  | 0.14 | 14.19  | 8.73E-03 |
| PA443690    | Charcot-Marie-Tooth Disease         | 95  | 0.15 | 13.29  | 9.90E-03 |
| PA445382    | Polyps                              | 95  | 0.15 | 13.29  | 9.90E-03 |
| PA445296    | Periodontal Diseases                | 96  | 0.15 | 13.15  | 1.01E-02 |
| PA447230    | HIV                                 | 862 | 1.37 | 3.66   | 1.08E-02 |
| PA165108641 | Acatalasia                          | 7   | 0.01 | 90.20  | 1.10E-02 |
| PA165108334 | Ulnar neuropathy                    | 8   | 0.01 | 78.93  | 1.26E-02 |
| PA446833    | Pouchitis                           | 8   | 0.01 | 78.93  | 1.26E-02 |
| PA445355    | Pneumonia                           | 109 | 0.17 | 11.59  | 1.29E-02 |
| PA446540    | Cytomegalovirus Retinitis           | 9   | 0.01 | 70.16  | 1.42E-02 |
| PA447149    | Chills                              | 9   | 0.01 | 70.16  | 1.42E-02 |
| PA444231    | Fructose Intolerance                | 10  | 0.02 | 63.14  | 1.57E-02 |
| PA443820    | Cryptococcosis                      | 11  | 0.02 | 57.40  | 1.73E-02 |

457

458

459

**Supplemental Table S20. 35 up-DEGs significantly associated with severe COVID-19 among ABO+ megakaryocytes matched in druggable gene categories**

| <b>Druggable Gene Category</b> | <b>Matching Gene Count</b> | <b>Matching Gene(s)</b>                                                              |
|--------------------------------|----------------------------|--------------------------------------------------------------------------------------|
| Druggable genome               | 11                         | <i>ACPI, CFLAR, CYB5R3, FKBP8, HSPB1, MPIG6B, P2RX1, S100A8, S100A9, SMOX, TUBB1</i> |
| Enzyme                         | 9                          | <i>ACPI, ATP6V1E1, CYB5R3, ENO1, HK1, S100A8, S100A9, SMOX, SUPT4H1</i>              |
| Kinase                         | 5                          | <i>HCST, HK1, S100A8, S100A9, SKP1</i>                                               |

|                                  |   |                                         |
|----------------------------------|---|-----------------------------------------|
| Transporter                      | 4 | <i>ATF4, ATP6V1E1, SEC14L1, SLC44A2</i> |
| Cell surface                     | 2 | <i>ENO1, HCST</i>                       |
| Clinically actionable            | 1 | <i>MYH9</i>                             |
| Drug resistance                  | 1 | <i>CFLAR</i>                            |
| External side of plasma membrane | 1 | <i>P2RX1</i>                            |
| Ion channel                      | 1 | <i>P2RX1</i>                            |
| Protease                         | 1 | <i>CFLAR</i>                            |
| Protein phosphatase              | 1 | <i>ACPI</i>                             |
| Transcription factor             | 1 | <i>ATF4</i>                             |

460

461

462

**Supplemental Table S21. Pathway enrichment analysis of 158 highly-expressed genes among CXCR6+ memory CD8+T cells.**

| Pathway name                                    | Size | Enrichment Ratio | P Value  | FDR      |
|-------------------------------------------------|------|------------------|----------|----------|
| Cytokine-cytokine receptor interaction          | 294  | 5.65             | 1.24E-08 | 4.04E-06 |
| Inflammatory bowel disease (IBD)                | 65   | 9.58             | 3.43E-05 | 5.58E-03 |
| NF-kappa B signaling pathway                    | 95   | 5.46             | 2.14E-03 | 2.32E-01 |
| Toxoplasmosis                                   | 113  | 4.59             | 4.54E-03 | 2.85E-01 |
| Necroptosis                                     | 162  | 3.84             | 4.55E-03 | 2.85E-01 |
| Allograft rejection                             | 38   | 8.19             | 5.69E-03 | 2.85E-01 |
| Pyruvate metabolism                             | 39   | 7.98             | 6.12E-03 | 2.85E-01 |
| ABC transporters                                | 44   | 7.07             | 8.57E-03 | 3.49E-01 |
| Apoptosis                                       | 136  | 3.81             | 9.81E-03 | 3.55E-01 |
| Intestinal immune network for IgA production    | 49   | 6.35             | 1.15E-02 | 3.76E-01 |
| Autoimmune thyroid disease                      | 53   | 5.87             | 1.43E-02 | 4.23E-01 |
| Chagas disease (American trypanosomiasis)       | 102  | 4.07             | 1.66E-02 | 4.51E-01 |
| Human cytomegalovirus infection                 | 225  | 2.77             | 2.09E-02 | 5.25E-01 |
| Kaposi sarcoma-associated herpesvirus infection | 186  | 2.79             | 3.32E-02 | 6.83E-01 |
| Citrate cycle (TCA cycle)                       | 30   | 6.92             | 3.35E-02 | 6.83E-01 |

|                                                     |     |       |          |          |
|-----------------------------------------------------|-----|-------|----------|----------|
| Chemokine signaling pathway                         | 189 | 2.74  | 3.52E-02 | 6.83E-01 |
| Circadian rhythm                                    | 31  | 6.69  | 3.56E-02 | 6.83E-01 |
| Measles                                             | 132 | 3.14  | 3.81E-02 | 6.85E-01 |
| Apoptosis                                           | 33  | 6.29  | 3.99E-02 | 6.85E-01 |
| Phenylalanine, tyrosine and tryptophan biosynthesis | 5   | 20.75 | 4.73E-02 | 7.71E-01 |

**Supplemental Table S22. GO-terms enrichment analysis of 108 up-DEGs associated with COVID-19 among *CXCR6*+ memory CD8+T cells.**

| GO-terms                                                                                    | Size | Enrichment ratio | P Value  | FDR      |
|---------------------------------------------------------------------------------------------|------|------------------|----------|----------|
| Immune response-activating cell surface receptor signaling pathway                          | 300  | 6.79             | 6.30E-07 | 2.83E-03 |
| Positive regulation of immune system process                                                | 979  | 3.59             | 9.22E-07 | 2.83E-03 |
| Immune response-activating signal transduction                                              | 454  | 5.30             | 9.34E-07 | 2.83E-03 |
| Immune response-regulating cell surface receptor signaling pathway                          | 330  | 6.17             | 1.60E-06 | 3.54E-03 |
| Immune response-regulating signaling pathway                                                | 485  | 4.96             | 1.95E-06 | 3.54E-03 |
| Post-translational protein modification                                                     | 360  | 5.66             | 3.71E-06 | 4.83E-03 |
| Regulation of immune system process                                                         | 1400 | 2.91             | 3.72E-06 | 4.83E-03 |
| Positive regulation of immune response                                                      | 706  | 3.93             | 5.21E-06 | 5.63E-03 |
| Activation of immune response                                                               | 534  | 4.51             | 5.58E-06 | 5.63E-03 |
| Leukocyte differentiation                                                                   | 496  | 4.48             | 1.41E-05 | 1.28E-02 |
| Hemopoiesis                                                                                 | 791  | 3.51             | 2.01E-05 | 1.66E-02 |
| Hematopoietic or lymphoid organ development                                                 | 833  | 3.33             | 3.67E-05 | 2.78E-02 |
| Regulation of hemopoiesis                                                                   | 389  | 4.76             | 4.64E-05 | 3.25E-02 |
| Immune response-regulating cell surface receptor signaling pathway involved in phagocytosis | 76   | 12.18            | 5.61E-05 | 3.28E-02 |
| Fc-gamma receptor signaling pathway involved in phagocytosis                                | 76   | 12.18            | 5.61E-05 | 3.28E-02 |
| Immune response                                                                             | 1919 | 2.32             | 5.76E-05 | 3.28E-02 |
| Antigen receptor-mediated signaling pathway                                                 | 184  | 7.04             | 6.16E-05 | 3.29E-02 |
| Fc-gamma receptor signaling pathway                                                         | 79   | 11.72            | 6.75E-05 | 3.32E-02 |
| Immune system development                                                                   | 881  | 3.15             | 6.94E-05 | 3.32E-02 |
| Fc receptor mediated stimulatory signaling pathway                                          | 81   | 11.43            | 7.61E-05 | 3.46E-02 |

|                                         |     |      |          |          |
|-----------------------------------------|-----|------|----------|----------|
| Regulation of leukocyte differentiation | 263 | 5.63 | 8.77E-05 | 3.80E-02 |
| Regulation of immune response           | 909 | 3.06 | 9.86E-05 | 4.07E-02 |

466

467 **References**

- 468 1. M. Ghousaini *et al.*, Open Targets Genetics: systematic identification of trait-associated  
469 genes using large-scale genetics and functional genomics. *Nucleic Acids Res* **49**, D1311-  
470 d1320 (2021).
- 471 2. Y. Ma *et al.*, Integrative Genomics Analysis Reveals a 21q22.11 Locus Contributing Risk  
472 to COVID-19. *Hum Mol Genet*, (2021).
- 473 3. E. Pairo-Castineira *et al.*, Genetic mechanisms of critical illness in COVID-19. *Nature*  
474 **591**, 92-98 (2021).
- 475 4. C. A. de Leeuw, J. M. Mooij, T. Heskes, D. Posthuma, MAGMA: generalized gene-set  
476 analysis of GWAS data. *PLoS Comput Biol* **11**, e1004219 (2015).
- 477 5. A. Auton *et al.*, A global reference for human genetic variation. *Nature* **526**, 68-74 (2015).  
478
